# Supplementary material for: Development and validation of the facial scale (FaceSed) to evaluate sedation in horses
Source: PLoS One. 2021 Jun 1;16(6):e0251909. doi: 10.1371/journal.pone.0251909 (PMC8168851; doi:10.1371/journal.pone.0251909)
Supplement: S1 Data — (XLSX) [file pone.0251909.s003.xlsx]

## Sheet: Data FaceSed
Randomization.photo	Treatment.order	Treatment	Moment	Time	Horse	Evaluator	Phase	HHAG (cm)	HHAG%	Randomization.photo	NRS.photo	Ears.photo	Eyes.photo	Lower.lip.photo	Upper.lip.photo	FaceSed total score
145	1	DL	M1	0	DIAMANTE	E1	1st	100	100	145	1	0	0	0	0	0
49	1	DL	M2	120	DIAMANTE	E1	1st	25	25	49	7	1	2	1	2	6
164	1	DL	M3	150	DIAMANTE	E1	1st	93	93	164	3	1	1	0	0	2
71	1	DL	M4	240	DIAMANTE	E1	1st	100	100	71	1	0	0	0	0	0
17	1	DL	M1	0	TUFAO	E1	1st	98	100	17	1	0	0	0	0	0
141	1	DL	M2	120	TUFAO	E1	1st	42	42.8571	141	6	1	2	1	1	5
142	1	DL	M3	150	TUFAO	E1	1st	81	82.6531	142	6	1	2	1	1	5
122	1	DL	M4	240	TUFAO	E1	1st	103	105.102	122	1	0	0	0	0	0
63	2	DL	M1	0	TURQUESA	E1	1st	105	100	63	1	0	0	0	0	0
154	2	DL	M2	120	TURQUESA	E1	1st	75	71.4286	154	6	2	2	1	0	5
48	2	DL	M3	150	TURQUESA	E1	1st	98	93.3333	48	1	0	0	0	0	0
43	2	DL	M4	240	TURQUESA	E1	1st	110	104.762	43	4	1	1	0	0	2
31	2	DL	M1	0	FAVORITO	E1	1st	95	100	31	1	1	0	0	0	1
76	2	DL	M2	120	FAVORITO	E1	1st	50	52.6316	76	7	1	1	2	1	5
59	2	DL	M3	150	FAVORITO	E1	1st	100	105.263	59	2	0	0	1	0	1
19	2	DL	M4	240	FAVORITO	E1	1st	98	103.158	19	3	1	0	1	0	2
94	2	DL	M1	0	PARIS.BELLS	E1	1st	105	100	94	2	0	0	1	0	1
16	2	DL	M2	120	PARIS.BELLS	E1	1st	60	57.1429	16	5	2	1	1	1	5
156	2	DL	M3	150	PARIS.BELLS	E1	1st	100	95.2381	156	4	1	1	0	1	3
29	2	DL	M4	240	PARIS.BELLS	E1	1st	115	109.524	29	3	1	0	1	0	2
148	3	DL	M1	0	MARJORIE	E1	1st	110	100	148	1	0	0	0	0	0
98	3	DL	M2	120	MARJORIE	E1	1st	75	68.1818	98	7	2	2	1	1	6
12	3	DL	M3	150	MARJORIE	E1	1st	90	81.8182	12	4	2	1	0	0	3
87	3	DL	M4	240	MARJORIE	E1	1st	95	86.3636	87	1	0	0	0	0	0
35	4	DL	M1	0	PLANETA	E1	1st	90	100	35	1	0	0	1	0	1
160	4	DL	M2	120	PLANETA	E1	1st	20	22.2222	160	10	2	2	2	2	8
54	4	DL	M3	150	PLANETA	E1	1st	40	44.4444	54	8	2	2	0	0	4
47	4	DL	M4	240	PLANETA	E1	1st	75	83.3333	47	6	1	1	1	2	5
119	1	DH	M1	0	FAVORITO	E1	1st	98	100	119	1	0	0	0	0	0
69	1	DH	M2	120	FAVORITO	E1	1st	27	27.551	69	7	2	1	2	2	7
78	1	DH	M3	150	FAVORITO	E1	1st	75	76.5306	78	6	2	1	1	1	5
137	1	DH	M4	240	FAVORITO	E1	1st	95	96.9388	137	1	0	0	0	0	0
50	2	DH	M1	0	DIAMANTE	E1	1st	95	100	50	1	0	0	0	0	0
92	2	DH	M2	120	DIAMANTE	E1	1st	45	47.3684	92	10	2	2	2	2	8
70	2	DH	M3	150	DIAMANTE	E1	1st	75	78.9474	70	2	0	1	0	0	1
112	2	DH	M4	240	DIAMANTE	E1	1st	100	105.263	112	2	0	1	0	0	1
166	2	DH	M1	0	PLANETA	E1	1st	93	100	166	2	0	0	1	0	1
15	2	DH	M2	120	PLANETA	E1	1st	25	26.8817	15	10	2	2	2	2	8
163	2	DH	M3	150	PLANETA	E1	1st	25	26.8817	163	8	1	2	2	2	7
41	2	DH	M4	240	PLANETA	E1	1st	80	86.0215	41	3	0	0	0	1	1
1	4	DH	M1	0	TURQUESA	E1	1st	100	100	1	1	0	0	0	0	0
89	4	DH	M2	120	TURQUESA	E1	1st	45	45	89	5	2	1	1	0	4
79	4	DH	M3	150	TURQUESA	E1	1st	60	60	79	4	1	1	1	0	3
9	4	DH	M4	240	TURQUESA	E1	1st	105	105	9	1	0	0	0	0	0
101	4	DH	M1	0	PARIS.BELLS	E1	1st	110	100	101	1	0	0	0	0	0
125	4	DH	M2	120	PARIS.BELLS	E1	1st	20	18.1818	125	10	2	2	2	2	8
138	4	DH	M3	150	PARIS.BELLS	E1	1st	30	27.2727	138	10	2	2	2	2	8
129	4	DH	M4	240	PARIS.BELLS	E1	1st	115	104.545	129	2	0	0	1	0	1
38	4	DH	M1	0	TUFAO	E1	1st	95	100	38	1	0	0	0	0	0
64	4	DH	M2	120	TUFAO	E1	1st	20	21.0526	64	8	1	2	1	2	6
4	4	DH	M3	150	TUFAO	E1	1st	35	36.8421	4	7	2	2	0	1	5
105	4	DH	M4	240	TUFAO	E1	1st	95	100	105	1	0	0	0	0	0
74	4	DH	M1	0	MARJORIE	E1	1st	100	100	74	4	1	0	1	0	2
6	4	DH	M2	120	MARJORIE	E1	1st	35	35	6	8	2	2	1	1	6
88	4	DH	M3	150	MARJORIE	E1	1st	80	80	88	4	2	1	0	1	4
30	4	DH	M4	240	MARJORIE	E1	1st	95	95	30	1	0	0	1	0	1
56	1	DLM	M1	0	MARJORIE	E1	1st	100	100	56	1	0	0	0	0	0
155	1	DLM	M2	120	MARJORIE	E1	1st	75	75	155	4	2	1	0	1	4
103	1	DLM	M3	150	MARJORIE	E1	1st	80	80	103	2	1	0	0	0	1
130	1	DLM	M4	240	MARJORIE	E1	1st	100	100	130	2	1	0	0	0	1
153	1	DLM	M1	0	PARIS.BELLS	E1	1st	110	100	153	2	0	0	1	0	1
102	1	DLM	M2	120	PARIS.BELLS	E1	1st	70	63.6364	102	3	2	1	1	0	4
109	1	DLM	M3	150	PARIS.BELLS	E1	1st	90	81.8182	109	1	0	0	0	0	0
83	1	DLM	M4	240	PARIS.BELLS	E1	1st	112	101.818	83	1	0	0	0	0	0
110	3	DLM	M1	0	DIAMANTE	E1	1st	109	100	110	3	1	0	1	0	2
108	3	DLM	M2	120	DIAMANTE	E1	1st	40	36.6972	108	10	2	2	2	2	8
97	3	DLM	M3	150	DIAMANTE	E1	1st	100	91.7431	97	5	1	1	1	0	3
25	3	DLM	M4	240	DIAMANTE	E1	1st	105	96.3303	25	2	0	1	0	0	1
117	3	DLM	M1	0	FAVORITO	E1	1st	95	100	117	3	1	0	1	0	2
20	3	DLM	M2	120	FAVORITO	E1	1st	85	89.4737	20	3	1	1	0	0	2
36	3	DLM	M3	150	FAVORITO	E1	1st	90	94.7368	36	4	1	1	0	1	3
60	3	DLM	M4	240	FAVORITO	E1	1st	95	100	60	1	0	0	0	0	0
23	1	DLM	M1	0	TURQUESA	E1	1st	112	100	23	1	0	0	0	0	0
7	1	DLM	M2	120	TURQUESA	E1	1st	88	78.5714	7	3	1	0	0	0	1
39	1	DLM	M3	150	TURQUESA	E1	1st	95	84.8214	39	2	1	0	0	0	1
95	1	DLM	M4	240	TURQUESA	E1	1st	120	107.143	95	1	0	0	0	0	0
126	1	DLM	M1	0	PLANETA	E1	1st	85	100	126	2	0	0	0	1	1
123	1	DLM	M2	120	PLANETA	E1	1st	25	29.4118	123	9	1	2	2	2	7
96	1	DLM	M3	150	PLANETA	E1	1st	40	47.0588	96	6	1	2	1	1	5
58	1	DLM	M4	240	PLANETA	E1	1st	85	100	58	3	1	0	0	1	2
66	3	DLM	M1	0	TUFAO	E1	1st	95	100	66	1	0	0	0	0	0
118	3	DLM	M2	120	TUFAO	E1	1st	48	50.5263	118	8	2	2	1	2	7
84	3	DLM	M3	150	TUFAO	E1	1st	88	92.6316	84	2	0	1	0	0	1
144	3	DLM	M4	240	TUFAO	E1	1st	100	105.263	144	2	0	0	0	1	1
162	4	DHM	M1	0	DIAMANTE	E1	1st	95	100	162	3	0	1	1	0	2
139	4	DHM	M2	120	DIAMANTE	E1	1st	15	15.7895	139	10	2	2	2	2	8
111	4	DHM	M3	150	DIAMANTE	E1	1st	65	68.4211	111	6	1	2	1	1	5
143	4	DHM	M4	240	DIAMANTE	E1	1st	95	100	143	4	0	2	0	0	2
51	4	DHM	M1	0	FAVORITO	E1	1st	95	100	51	2	1	0	1	0	2
24	4	DHM	M2	120	FAVORITO	E1	1st	45	47.3684	24	8	2	2	1	0	5
100	4	DHM	M3	150	FAVORITO	E1	1st	90	94.7368	100	7	2	2	1	1	6
8	4	DHM	M4	240	FAVORITO	E1	1st	80	84.2105	8	1	0	0	0	0	0
104	2	DHM	M1	0	TUFAO	E1	1st	85	100	104	1	0	0	0	0	0
53	2	DHM	M2	120	TUFAO	E1	1st	15	17.6471	53	9	1	0	2	2	5
91	2	DHM	M3	150	TUFAO	E1	1st	55	64.7059	91	7	1	2	1	2	6
34	2	DHM	M4	240	TUFAO	E1	1st	105	123.529	34	1	0	0	0	0	0
135	3	DHM	M1	0	TURQUESA	E1	1st	105	100	135	1	0	0	0	0	0
5	3	DHM	M2	120	TURQUESA	E1	1st	32	30.4762	5	8	2	2	1	0	5
57	3	DHM	M3	150	TURQUESA	E1	1st	80	76.1905	57	5	2	2	1	0	5
136	3	DHM	M4	240	TURQUESA	E1	1st	105	100	136	4	0	1	1	0	2
85	2	DHM	M1	0	MARJORIE	E1	1st	95	100	85	1	0	0	0	0	0
150	2	DHM	M2	120	MARJORIE	E1	1st	70	73.6842	150	6	2	1	1	1	5
80	2	DHM	M3	150	MARJORIE	E1	1st	90	94.7368	80	2	1	0	0	0	1
68	2	DHM	M4	240	MARJORIE	E1	1st	100	105.263	68	1	0	0	0	0	0
149	3	DHM	M1	0	PLANETA	E1	1st	68	100	149	2	0	0	1	0	1
40	3	DHM	M2	120	PLANETA	E1	1st	20	29.4118	40	10	2	2	2	2	8
120	3	DHM	M3	150	PLANETA	E1	1st	18	26.4706	120	10	2	2	2	2	8
33	3	DHM	M4	240	PLANETA	E1	1st	100	147.059	33	3	0	1	0	1	2
61	3	DHM	M1	0	PARIS.BELLS	E1	1st	110	100	61	1	0	0	0	0	0
157	3	DHM	M2	120	PARIS.BELLS	E1	1st	15	13.6364	157	10	2	2	2	2	8
81	3	DHM	M3	150	PARIS.BELLS	E1	1st	35	31.8182	81	9	2	2	2	1	7
13	3	DHM	M4	240	PARIS.BELLS	E1	1st	112	101.818	13	1	0	0	0	0	0
75	5	ACPL	M1	0	MARJORIE	E1	1st	105	100	75	1	0	0	0	0	0
107	5	ACPL	M2	60	MARJORIE	E1	1st	90	85.7143	107	5	2	0	1	1	4
159	5	ACPL	M3	90	MARJORIE	E1	1st	85	80.9524	159	5	1	1	1	1	4
52	5	ACPL	M4	120	MARJORIE	E1	1st	80	76.1905	52	4	2	0	1	0	3
124	5	ACPL	M1	0	TURQUESA	E1	1st	105	100	124	1	0	0	0	0	0
113	5	ACPL	M2	60	TURQUESA	E1	1st	88	83.8095	113	4	1	1	1	0	3
82	5	ACPL	M3	90	TURQUESA	E1	1st	95	90.4762	82	3	1	0	1	0	2
44	5	ACPL	M4	120	TURQUESA	E1	1st	100	95.2381	44	4	1	1	0	0	2
121	5	ACPL	M1	0	PARIS.BELLS	E1	1st	105	100	121	2	0	0	1	0	1
18	5	ACPL	M2	60	PARIS.BELLS	E1	1st	100	95.2381	18	3	1	1	0	0	2
133	5	ACPL	M3	90	PARIS.BELLS	E1	1st	88	83.8095	133	5	1	1	1	1	4
72	5	ACPL	M4	120	PARIS.BELLS	E1	1st	105	100	72	3	0	0	1	0	1
46	5	ACPL	M1	0	FAVORITO	E1	1st	95	100	46	1	0	0	0	0	0
2	5	ACPL	M2	60	FAVORITO	E1	1st	85	89.4737	2	5	1	1	1	0	3
93	5	ACPL	M3	90	FAVORITO	E1	1st	85	89.4737	93	5	1	1	2	1	5
90	5	ACPL	M4	120	FAVORITO	E1	1st	98	103.158	90	3	0	1	1	0	2
32	5	ACPL	M1	0	DIAMANTE	E1	1st	105	100	32	1	0	0	0	0	0
106	5	ACPL	M2	60	DIAMANTE	E1	1st	105	100	106	3	0	1	1	0	2
165	5	ACPL	M3	90	DIAMANTE	E1	1st	85	80.9524	165	2	0	0	1	0	1
99	5	ACPL	M4	120	DIAMANTE	E1	1st	105	100	99	1	0	0	0	0	0
3	5	ACPL	M1	0	TUFAO	E1	1st	95	100	3	1	0	0	0	0	0
151	5	ACPL	M2	60	TUFAO	E1	1st	90	94.7368	151	4	1	1	0	1	3
22	5	ACPL	M3	90	TUFAO	E1	1st	78	82.1053	22	2	0	1	0	0	1
11	5	ACPL	M4	120	TUFAO	E1	1st	90	94.7368	11	1	0	0	0	0	0
161	5	ACPL	M1	0	PLANETA	E1	1st	92	100	161	2	0	0	1	0	1
65	5	ACPL	M2	60	PLANETA	E1	1st	25	27.1739	65	7	1	2	2	1	6
128	5	ACPL	M3	90	PLANETA	E1	1st	80	86.9565	128	5	0	1	1	2	4
114	5	ACPL	M4	120	PLANETA	E1	1st	65	70.6522	114	5	0	1	1	1	3
26	6	ACPH	M1	0	DIAMANTE	E1	1st	110	100	26	2	1	0	0	0	1
21	6	ACPH	M2	60	DIAMANTE	E1	1st	100	90.9091	21	5	1	1	2	0	4
86	6	ACPH	M3	90	DIAMANTE	E1	1st	55	50	86	6	1	1	2	1	5
158	6	ACPH	M4	120	DIAMANTE	E1	1st	78	70.9091	158	4	1	1	1	0	3
147	6	ACPH	M1	0	TUFAO	E1	1st	90	100	147	1	0	0	0	0	0
115	6	ACPH	M2	60	TUFAO	E1	1st	48	53.3333	115	6	1	2	1	1	5
37	6	ACPH	M3	90	TUFAO	E1	1st	90	100	37	5	1	1	0	1	3
67	6	ACPH	M4	120	TUFAO	E1	1st	93	103.333	67	3	0	1	0	1	2
62	6	ACPH	M1	0	MARJORIE	E1	1st	110	100	62	2	1	0	1	0	2
73	6	ACPH	M2	60	MARJORIE	E1	1st	100	90.9091	73	5	1	1	0	1	3
167	6	ACPH	M3	90	MARJORIE	E1	1st	90	81.8182	167	3	1	1	0	0	2
10	6	ACPH	M4	120	MARJORIE	E1	1st	105	95.4545	10	2	0	1	0	0	1
134	6	ACPH	M1	0	TURQUESA	E1	1st	98	100	134	2	1	0	0	0	1
146	6	ACPH	M2	60	TURQUESA	E1	1st	65	66.3265	146	4	0	1	1	0	2
77	6	ACPH	M3	90	TURQUESA	E1	1st	100	102.041	77	4	0	1	1	0	2
28	6	ACPH	M4	120	TURQUESA	E1	1st	90	91.8367	28	6	1	1	1	0	3
14	6	ACPH	M1	0	FAVORITO	E1	1st	100	100	14	2	0	1	1	0	2
131	6	ACPH	M2	60	FAVORITO	E1	1st	62	62	131	6	2	1	2	0	5
152	6	ACPH	M3	90	FAVORITO	E1	1st	65	65	152	7	2	2	2	1	7
132	6	ACPH	M4	120	FAVORITO	E1	1st	80	80	132	5	1	1	1	1	4
55	6	ACPH	M1	0	PLANETA	E1	1st	95	100	55	1	0	0	1	0	1
27	6	ACPH	M2	60	PLANETA	E1	1st	62	65.2632	27	8	0	2	1	1	4
168	6	ACPH	M3	90	PLANETA	E1	1st	60	63.1579	168	8	1	2	2	1	6
127	6	ACPH	M4	120	PLANETA	E1	1st	65	68.4211	127	7	2	2	1	2	7
42	6	ACPH	M1	0	PARIS.BELLS	E1	1st	100	100	42	1	0	0	1	0	1
116	6	ACPH	M2	60	PARIS.BELLS	E1	1st	80	80	116	5	1	1	2	1	5
140	6	ACPH	M3	90	PARIS.BELLS	E1	1st	90	90	140	6	1	1	1	2	5
45	6	ACPH	M4	120	PARIS.BELLS	E1	1st	105	105	45	4	0	1	1	0	2
40	1	DL	M1	0	DIAMANTE	E1	2nd			40	4	1	1	0	0	2
28	1	DL	M2	120	DIAMANTE	E1	2nd			28	9	2	2	2	1	7
138	1	DL	M3	150	DIAMANTE	E1	2nd			138	3	1	1	0	0	2
168	1	DL	M4	240	DIAMANTE	E1	2nd			168	3	1	1	0	0	2
53	1	DL	M1	0	TUFAO	E1	2nd			53	1	0	0	0	0	0
34	1	DL	M2	120	TUFAO	E1	2nd			34	8	2	2	1	1	6
131	1	DL	M3	150	TUFAO	E1	2nd			131	5	1	2	0	1	4
19	1	DL	M4	240	TUFAO	E1	2nd			19	1	0	0	0	0	0
91	2	DL	M1	0	TURQUESA	E1	2nd			91	1	0	0	0	0	0
166	2	DL	M2	120	TURQUESA	E1	2nd			166	5	2	2	1	0	5
165	2	DL	M3	150	TURQUESA	E1	2nd			165	3	1	1	0	0	2
9	2	DL	M4	240	TURQUESA	E1	2nd			9	3	1	0	0	0	1
33	2	DL	M1	0	FAVORITO	E1	2nd			33	2	0	0	1	0	1
50	2	DL	M2	120	FAVORITO	E1	2nd			50	7	2	1	1	1	5
141	2	DL	M3	150	FAVORITO	E1	2nd			141	1	0	0	0	0	0
12	2	DL	M4	240	FAVORITO	E1	2nd			12	3	1	0	1	0	2
122	2	DL	M1	0	PARIS.BELLS	E1	2nd			122	3	0	0	1	1	2
23	2	DL	M2	120	PARIS.BELLS	E1	2nd			23	6	2	1	1	1	5
119	2	DL	M3	150	PARIS.BELLS	E1	2nd			119	4	0	1	1	1	3
88	2	DL	M4	240	PARIS.BELLS	E1	2nd			88	2	0	0	1	0	1
154	3	DL	M1	0	MARJORIE	E1	2nd			154	1	0	0	0	0	0
11	3	DL	M2	120	MARJORIE	E1	2nd			11	8	2	2	2	1	7
24	3	DL	M3	150	MARJORIE	E1	2nd			24	4	1	0	1	0	2
110	3	DL	M4	240	MARJORIE	E1	2nd			110	2	1	0	0	0	1
132	4	DL	M1	0	PLANETA	E1	2nd			132	1	0	0	0	0	0
32	4	DL	M2	120	PLANETA	E1	2nd			32	10	2	2	2	2	8
18	4	DL	M3	150	PLANETA	E1	2nd			18	7	1	2	1	1	5
118	4	DL	M4	240	PLANETA	E1	2nd			118	3	0	0	1	1	2
16	1	DH	M1	0	FAVORITO	E1	2nd			16	1	0	0	0	0	0
14	1	DH	M2	120	FAVORITO	E1	2nd			14	7	2	1	1	2	6
113	1	DH	M3	150	FAVORITO	E1	2nd			113	4	2	1	0	1	4
4	1	DH	M4	240	FAVORITO	E1	2nd			4	3	0	1	0	0	1
115	2	DH	M1	0	DIAMANTE	E1	2nd			115	1	0	0	0	0	0
106	2	DH	M2	120	DIAMANTE	E1	2nd			106	10	2	2	2	2	8
76	2	DH	M3	150	DIAMANTE	E1	2nd			76	5	1	1	1	1	4
62	2	DH	M4	240	DIAMANTE	E1	2nd			62	2	0	1	0	0	1
45	2	DH	M1	0	PLANETA	E1	2nd			45	2	0	0	1	0	1
29	2	DH	M2	120	PLANETA	E1	2nd			29	10	2	2	2	2	8
152	2	DH	M3	150	PLANETA	E1	2nd			152	8	1	2	2	2	7
100	2	DH	M4	240	PLANETA	E1	2nd			100	3	0	0	1	1	2
93	4	DH	M1	0	TURQUESA	E1	2nd			93	1	0	0	0	0	0
25	4	DH	M2	120	TURQUESA	E1	2nd			25	8	2	2	1	1	6
102	4	DH	M3	150	TURQUESA	E1	2nd			102	5	1	1	1	0	3
97	4	DH	M4	240	TURQUESA	E1	2nd			97	2	0	0	1	0	1
68	4	DH	M1	0	PARIS.BELLS	E1	2nd			68	2	0	0	1	0	1
126	4	DH	M2	120	PARIS.BELLS	E1	2nd			126	9	2	2	1	2	7
167	4	DH	M3	150	PARIS.BELLS	E1	2nd			167	7	2	2	1	1	6
83	4	DH	M4	240	PARIS.BELLS	E1	2nd			83	1	0	0	0	0	0
3	4	DH	M1	0	TUFAO	E1	2nd			3	2	0	0	0	1	1
111	4	DH	M2	120	TUFAO	E1	2nd			111	8	2	2	1	2	7
65	4	DH	M3	150	TUFAO	E1	2nd			65	8	2	2	1	1	6
38	4	DH	M4	240	TUFAO	E1	2nd			38	1	0	0	0	0	0
36	4	DH	M1	0	MARJORIE	E1	2nd			36	4	1	0	1	0	2
17	4	DH	M2	120	MARJORIE	E1	2nd			17	10	2	2	2	2	8
146	4	DH	M3	150	MARJORIE	E1	2nd			146	7	2	2	1	1	6
82	4	DH	M4	240	MARJORIE	E1	2nd			82	2	0	0	1	0	1
156	1	DLM	M1	0	MARJORIE	E1	2nd			156	1	0	0	0	0	0
101	1	DLM	M2	120	MARJORIE	E1	2nd			101	7	2	2	1	1	6
103	1	DLM	M3	150	MARJORIE	E1	2nd			103	3	1	1	0	0	2
72	1	DLM	M4	240	MARJORIE	E1	2nd			72	2	1	0	0	0	1
109	1	DLM	M1	0	PARIS.BELLS	E1	2nd			109	2	0	0	1	0	1
117	1	DLM	M2	120	PARIS.BELLS	E1	2nd			117	4	2	0	1	0	3
161	1	DLM	M3	150	PARIS.BELLS	E1	2nd			161	2	1	0	0	0	1
89	1	DLM	M4	240	PARIS.BELLS	E1	2nd			89	4	0	1	1	1	3
78	3	DLM	M1	0	DIAMANTE	E1	2nd			78	4	1	1	1	0	3
48	3	DLM	M2	120	DIAMANTE	E1	2nd			48	10	2	2	2	2	8
60	3	DLM	M3	150	DIAMANTE	E1	2nd			60	6	2	1	1	1	5
5	3	DLM	M4	240	DIAMANTE	E1	2nd			5	3	0	1	0	0	1
134	3	DLM	M1	0	FAVORITO	E1	2nd			134	4	1	1	1	0	3
1	3	DLM	M2	120	FAVORITO	E1	2nd			1	4	1	1	0	1	3
155	3	DLM	M3	150	FAVORITO	E1	2nd			155	5	1	1	1	1	4
46	3	DLM	M4	240	FAVORITO	E1	2nd			46	1	0	0	0	0	0
39	1	DLM	M1	0	TURQUESA	E1	2nd			39	1	0	0	0	0	0
114	1	DLM	M2	120	TURQUESA	E1	2nd			114	3	1	1	0	0	2
157	1	DLM	M3	150	TURQUESA	E1	2nd			157	2	1	0	0	0	1
49	1	DLM	M4	240	TURQUESA	E1	2nd			49	1	0	0	0	0	0
63	1	DLM	M1	0	PLANETA	E1	2nd			63	4	0	1	1	1	3
137	1	DLM	M2	120	PLANETA	E1	2nd			137	7	1	2	2	2	7
67	1	DLM	M3	150	PLANETA	E1	2nd			67	8	2	2	1	1	6
135	1	DLM	M4	240	PLANETA	E1	2nd			135	3	1	0	1	1	3
6	3	DLM	M1	0	TUFAO	E1	2nd			6	1	0	0	0	0	0
51	3	DLM	M2	120	TUFAO	E1	2nd			51	8	2	2	1	2	7
99	3	DLM	M3	150	TUFAO	E1	2nd			99	5	1	1	1	1	4
27	3	DLM	M4	240	TUFAO	E1	2nd			27	1	0	0	0	0	0
148	4	DHM	M1	0	DIAMANTE	E1	2nd			148	3	0	1	1	0	2
7	4	DHM	M2	120	DIAMANTE	E1	2nd			7	9	2	2	2	2	8
90	4	DHM	M3	150	DIAMANTE	E1	2nd			90	8	2	2	1	2	7
136	4	DHM	M4	240	DIAMANTE	E1	2nd			136	3	1	1	0	0	2
85	4	DHM	M1	0	FAVORITO	E1	2nd			85	3	1	0	1	0	2
31	4	DHM	M2	120	FAVORITO	E1	2nd			31	7	2	2	1	2	7
26	4	DHM	M3	150	FAVORITO	E1	2nd			26	7	1	2	1	1	5
84	4	DHM	M4	240	FAVORITO	E1	2nd			84	3	1	0	1	0	2
47	2	DHM	M1	0	TUFAO	E1	2nd			47	1	0	0	0	0	0
56	2	DHM	M2	120	TUFAO	E1	2nd			56	9	1	2	2	2	7
64	2	DHM	M3	150	TUFAO	E1	2nd			64	9	2	2	1	2	7
153	2	DHM	M4	240	TUFAO	E1	2nd			153	1	0	0	0	0	0
58	3	DHM	M1	0	TURQUESA	E1	2nd			58	1	0	0	0	0	0
41	3	DHM	M2	120	TURQUESA	E1	2nd			41	9	2	2	2	1	7
71	3	DHM	M3	150	TURQUESA	E1	2nd			71	7	2	2	0	1	5
81	3	DHM	M4	240	TURQUESA	E1	2nd			81	3	0	1	1	0	2
129	2	DHM	M1	0	MARJORIE	E1	2nd			129	1	0	0	0	0	0
144	2	DHM	M2	120	MARJORIE	E1	2nd			144	6	2	1	1	1	5
120	2	DHM	M3	150	MARJORIE	E1	2nd			120	3	1	1	0	0	2
35	2	DHM	M4	240	MARJORIE	E1	2nd			35	2	1	0	0	0	1
42	3	DHM	M1	0	PLANETA	E1	2nd			42	3	0	1	1	0	2
95	3	DHM	M2	120	PLANETA	E1	2nd			95	10	2	2	2	2	8
87	3	DHM	M3	150	PLANETA	E1	2nd			87	10	2	2	2	2	8
61	3	DHM	M4	240	PLANETA	E1	2nd			61	4	0	1	1	1	3
145	3	DHM	M1	0	PARIS.BELLS	E1	2nd			145	1	0	0	0	0	0
96	3	DHM	M2	120	PARIS.BELLS	E1	2nd			96	9	2	2	2	2	8
74	3	DHM	M3	150	PARIS.BELLS	E1	2nd			74	8	2	2	1	1	6
80	3	DHM	M4	240	PARIS.BELLS	E1	2nd			80	1	0	0	0	0	0
13	5	ACPL	M1	0	MARJORIE	E1	2nd			13	2	1	1	1	0	3
125	5	ACPL	M2	60	MARJORIE	E1	2nd			125	3	0	1	1	0	2
139	5	ACPL	M3	90	MARJORIE	E1	2nd			139	5	1	1	1	1	4
124	5	ACPL	M4	120	MARJORIE	E1	2nd			124	4	2	0	1	0	3
133	5	ACPL	M1	0	TURQUESA	E1	2nd			133	1	0	0	0	0	0
86	5	ACPL	M2	60	TURQUESA	E1	2nd			86	4	1	1	1	0	3
79	5	ACPL	M3	90	TURQUESA	E1	2nd			79	4	1	1	1	0	3
98	5	ACPL	M4	120	TURQUESA	E1	2nd			98	5	1	1	1	1	4
43	5	ACPL	M1	0	PARIS.BELLS	E1	2nd			43	2	0	0	1	0	1
57	5	ACPL	M2	60	PARIS.BELLS	E1	2nd			57	4	1	1	0	1	3
77	5	ACPL	M3	90	PARIS.BELLS	E1	2nd			77	5	1	1	1	1	4
163	5	ACPL	M4	120	PARIS.BELLS	E1	2nd			163	5	1	1	1	1	4
15	5	ACPL	M1	0	FAVORITO	E1	2nd			15	1	0	0	0	0	0
21	5	ACPL	M2	60	FAVORITO	E1	2nd			21	6	1	1	2	1	5
116	5	ACPL	M3	90	FAVORITO	E1	2nd			116	6	1	1	2	1	5
162	5	ACPL	M4	120	FAVORITO	E1	2nd			162	4	0	1	1	1	3
150	5	ACPL	M1	0	DIAMANTE	E1	2nd			150	1	0	0	0	0	0
121	5	ACPL	M2	60	DIAMANTE	E1	2nd			121	2	0	0	1	0	1
108	5	ACPL	M3	90	DIAMANTE	E1	2nd			108	2	0	0	0	1	1
55	5	ACPL	M4	120	DIAMANTE	E1	2nd			55	2	1	0	0	0	1
158	5	ACPL	M1	0	TUFAO	E1	2nd			158	1	0	0	0	0	0
66	5	ACPL	M2	60	TUFAO	E1	2nd			66	5	1	1	1	1	4
104	5	ACPL	M3	90	TUFAO	E1	2nd			104	2	0	1	0	0	1
2	5	ACPL	M4	120	TUFAO	E1	2nd			2	1	0	0	0	0	0
105	5	ACPL	M1	0	PLANETA	E1	2nd			105	2	0	0	1	0	1
92	5	ACPL	M2	60	PLANETA	E1	2nd			92	10	2	2	2	2	8
30	5	ACPL	M3	90	PLANETA	E1	2nd			30	4	0	1	1	1	3
73	5	ACPL	M4	120	PLANETA	E1	2nd			73	6	1	1	1	2	5
37	6	ACPH	M1	0	DIAMANTE	E1	2nd			37	1	0	0	0	0	0
107	6	ACPH	M2	60	DIAMANTE	E1	2nd			107	6	1	1	2	1	5
20	6	ACPH	M3	90	DIAMANTE	E1	2nd			20	7	1	1	2	2	6
70	6	ACPH	M4	120	DIAMANTE	E1	2nd			70	5	1	1	2	0	4
142	6	ACPH	M1	0	TUFAO	E1	2nd			142	1	0	0	0	0	0
127	6	ACPH	M2	60	TUFAO	E1	2nd			127	5	0	2	1	1	4
140	6	ACPH	M3	90	TUFAO	E1	2nd			140	4	1	1	0	1	3
112	6	ACPH	M4	120	TUFAO	E1	2nd			112	4	0	1	1	1	3
164	6	ACPH	M1	0	MARJORIE	E1	2nd			164	3	1	0	1	0	2
22	6	ACPH	M2	60	MARJORIE	E1	2nd			22	5	1	1	1	1	4
159	6	ACPH	M3	90	MARJORIE	E1	2nd			159	4	0	1	1	1	3
143	6	ACPH	M4	120	MARJORIE	E1	2nd			143	2	0	1	0	0	1
151	6	ACPH	M1	0	TURQUESA	E1	2nd			151	2	1	0	0	0	1
59	6	ACPH	M2	60	TURQUESA	E1	2nd			59	5	1	1	1	1	4
160	6	ACPH	M3	90	TURQUESA	E1	2nd			160	5	1	1	1	1	4
52	6	ACPH	M4	120	TURQUESA	E1	2nd			52	5	1	1	2	0	4
8	6	ACPH	M1	0	FAVORITO	E1	2nd			8	4	0	1	1	0	2
94	6	ACPH	M2	60	FAVORITO	E1	2nd			94	6	2	1	2	1	6
149	6	ACPH	M3	90	FAVORITO	E1	2nd			149	7	2	2	1	1	6
123	6	ACPH	M4	120	FAVORITO	E1	2nd			123	6	1	1	2	1	5
69	6	ACPH	M1	0	PLANETA	E1	2nd			69	3	1	0	1	0	2
54	6	ACPH	M2	60	PLANETA	E1	2nd			54	5	0	2	1	1	4
44	6	ACPH	M3	90	PLANETA	E1	2nd			44	10	2	2	2	2	8
75	6	ACPH	M4	120	PLANETA	E1	2nd			75	8	2	2	1	2	7
130	6	ACPH	M1	0	PARIS.BELLS	E1	2nd			130	3	0	0	1	1	2
128	6	ACPH	M2	60	PARIS.BELLS	E1	2nd			128	6	1	2	1	1	5
10	6	ACPH	M3	90	PARIS.BELLS	E1	2nd			10	6	1	1	1	1	4
147	6	ACPH	M4	120	PARIS.BELLS	E1	2nd			147	3	1	0	1	0	2
145	1	DL	M1	0	DIAMANTE	E2	1st			145	3	1	0	2	0	3
49	1	DL	M2	120	DIAMANTE	E2	1st			49	9	2	2	2	1	7
164	1	DL	M3	150	DIAMANTE	E2	1st			164	4	1	1	1	0	3
71	1	DL	M4	240	DIAMANTE	E2	1st			71	2	1	0	1	0	2
17	1	DL	M1	0	TUFAO	E2	1st			17	2	1	0	0	1	2
141	1	DL	M2	120	TUFAO	E2	1st			141	8	2	2	0	1	5
142	1	DL	M3	150	TUFAO	E2	1st			142	7	2	1	0	1	4
122	1	DL	M4	240	TUFAO	E2	1st			122	2	1	0	0	1	2
63	2	DL	M1	0	TURQUESA	E2	1st			63	2	1	0	1	0	2
154	2	DL	M2	120	TURQUESA	E2	1st			154	5	1	2	1	0	4
48	2	DL	M3	150	TURQUESA	E2	1st			48	3	1	1	1	0	3
43	2	DL	M4	240	TURQUESA	E2	1st			43	2	1	0	1	0	2
31	2	DL	M1	0	FAVORITO	E2	1st			31	2	1	0	1	0	2
76	2	DL	M2	120	FAVORITO	E2	1st			76	6	2	1	1	1	5
59	2	DL	M3	150	FAVORITO	E2	1st			59	4	2	0	1	0	3
19	2	DL	M4	240	FAVORITO	E2	1st			19	3	2	0	1	0	3
94	2	DL	M1	0	PARIS.BELLS	E2	1st			94	2	1	0	1	0	2
16	2	DL	M2	120	PARIS.BELLS	E2	1st			16	6	2	1	1	1	5
156	2	DL	M3	150	PARIS.BELLS	E2	1st			156	4	1	1	1	0	3
29	2	DL	M4	240	PARIS.BELLS	E2	1st			29	4	2	0	1	0	3
148	3	DL	M1	0	MARJORIE	E2	1st			148	2	1	0	0	0	1
98	3	DL	M2	120	MARJORIE	E2	1st			98	7	2	2	1	1	6
12	3	DL	M3	150	MARJORIE	E2	1st			12	5	2	1	1	0	4
87	3	DL	M4	240	MARJORIE	E2	1st			87	2	1	0	1	0	2
35	4	DL	M1	0	PLANETA	E2	1st			35	2	1	0	1	0	2
160	4	DL	M2	120	PLANETA	E2	1st			160	10	2	2	2	2	8
54	4	DL	M3	150	PLANETA	E2	1st			54	8	2	2	1	1	6
47	4	DL	M4	240	PLANETA	E2	1st			47	6	2	1	0	2	5
119	1	DH	M1	0	FAVORITO	E2	1st			119	2	1	0	0	1	2
69	1	DH	M2	120	FAVORITO	E2	1st			69	7	2	1	1	2	6
78	1	DH	M3	150	FAVORITO	E2	1st			78	6	2	1	1	1	5
137	1	DH	M4	240	FAVORITO	E2	1st			137	4	2	0	1	1	4
50	2	DH	M1	0	DIAMANTE	E2	1st			50	10	2	2	2	2	8
92	2	DH	M2	120	DIAMANTE	E2	1st			92	9	2	2	2	2	8
70	2	DH	M3	150	DIAMANTE	E2	1st			70	4	1	1	1	1	4
112	2	DH	M4	240	DIAMANTE	E2	1st			112	3	1	1	1	0	3
166	2	DH	M1	0	PLANETA	E2	1st			166	1	0	0	1	0	1
15	2	DH	M2	120	PLANETA	E2	1st			15	9	2	2	2	2	8
163	2	DH	M3	150	PLANETA	E2	1st			163	8	2	2	2	1	7
41	2	DH	M4	240	PLANETA	E2	1st			41	5	2	1	0	1	4
1	4	DH	M1	0	TURQUESA	E2	1st			1	3	2	0	1	0	3
89	4	DH	M2	120	TURQUESA	E2	1st			89	7	2	1	2	1	6
79	4	DH	M3	150	TURQUESA	E2	1st			79	6	2	1	1	1	5
9	4	DH	M4	240	TURQUESA	E2	1st			9	2	1	0	1	0	2
101	4	DH	M1	0	PARIS.BELLS	E2	1st			101	2	1	0	1	0	2
125	4	DH	M2	120	PARIS.BELLS	E2	1st			125	8	2	2	1	1	6
138	4	DH	M3	150	PARIS.BELLS	E2	1st			138	8	2	1	1	2	6
129	4	DH	M4	240	PARIS.BELLS	E2	1st			129	4	2	0	1	0	3
38	4	DH	M1	0	TUFAO	E2	1st			38	2	1	0	0	1	2
64	4	DH	M2	120	TUFAO	E2	1st			64	8	2	2	1	2	7
4	4	DH	M3	150	TUFAO	E2	1st			4	7	2	2	1	2	7
105	4	DH	M4	240	TUFAO	E2	1st			105	2	1	0	0	1	2
74	4	DH	M1	0	MARJORIE	E2	1st			74	2	1	0	1	0	2
6	4	DH	M2	120	MARJORIE	E2	1st			6	7	2	2	1	2	7
88	4	DH	M3	150	MARJORIE	E2	1st			88	5	2	1	0	1	4
30	4	DH	M4	240	MARJORIE	E2	1st			30	3	1	0	1	0	2
56	1	DLM	M1	0	MARJORIE	E2	1st			56	3	2	0	1	0	3
155	1	DLM	M2	120	MARJORIE	E2	1st			155	6	2	1	1	1	5
103	1	DLM	M3	150	MARJORIE	E2	1st			103	5	2	1	1	0	4
130	1	DLM	M4	240	MARJORIE	E2	1st			130	3	1	0	1	1	3
153	1	DLM	M1	0	PARIS.BELLS	E2	1st			153	2	1	0	1	0	2
102	1	DLM	M2	120	PARIS.BELLS	E2	1st			102	6	2	1	1	1	5
109	1	DLM	M3	150	PARIS.BELLS	E2	1st			109	5	1	1	1	1	4
83	1	DLM	M4	240	PARIS.BELLS	E2	1st			83	3	1	1	1	0	3
110	3	DLM	M1	0	DIAMANTE	E2	1st			110	6	2	1	2	1	6
108	3	DLM	M2	120	DIAMANTE	E2	1st			108	9	2	1	2	2	7
97	3	DLM	M3	150	DIAMANTE	E2	1st			97	6	2	1	1	0	4
25	3	DLM	M4	240	DIAMANTE	E2	1st			25	2	1	0	1	0	2
117	3	DLM	M1	0	FAVORITO	E2	1st			117	4	2	0	1	0	3
20	3	DLM	M2	120	FAVORITO	E2	1st			20	4	2	1	0	1	4
36	3	DLM	M3	150	FAVORITO	E2	1st			36	4	2	0	0	1	3
60	3	DLM	M4	240	FAVORITO	E2	1st			60	2	1	0	1	0	2
23	1	DLM	M1	0	TURQUESA	E2	1st			23	0	0	0	0	0	0
7	1	DLM	M2	120	TURQUESA	E2	1st			7	6	2	1	1	0	4
39	1	DLM	M3	150	TURQUESA	E2	1st			39	3	1	0	1	0	2
95	1	DLM	M4	240	TURQUESA	E2	1st			95	2	1	0	1	0	2
126	1	DLM	M1	0	PLANETA	E2	1st			126	2	1	0	1	0	2
123	1	DLM	M2	120	PLANETA	E2	1st			123	9	2	2	2	1	7
96	1	DLM	M3	150	PLANETA	E2	1st			96	7	2	1	2	1	6
58	1	DLM	M4	240	PLANETA	E2	1st			58	3	1	1	0	1	3
66	3	DLM	M1	0	TUFAO	E2	1st			66	0	0	0	0	0	0
118	3	DLM	M2	120	TUFAO	E2	1st			118	6	2	1	0	1	4
84	3	DLM	M3	150	TUFAO	E2	1st			84	6	2	1	0	1	4
144	3	DLM	M4	240	TUFAO	E2	1st			144	2	1	0	1	0	2
162	4	DHM	M1	0	DIAMANTE	E2	1st			162	2	0	1	1	0	2
139	4	DHM	M2	120	DIAMANTE	E2	1st			139	9	2	2	2	2	8
111	4	DHM	M3	150	DIAMANTE	E2	1st			111	7	2	2	1	1	6
143	4	DHM	M4	240	DIAMANTE	E2	1st			143	6	2	1	0	1	4
51	4	DHM	M1	0	FAVORITO	E2	1st			51	2	1	0	1	0	2
24	4	DHM	M2	120	FAVORITO	E2	1st			24	8	2	2	1	1	6
100	4	DHM	M3	150	FAVORITO	E2	1st			100	6	2	1	1	1	5
8	4	DHM	M4	240	FAVORITO	E2	1st			8	4	1	0	1	1	3
104	2	DHM	M1	0	TUFAO	E2	1st			104	1	0	0	1	0	1
53	2	DHM	M2	120	TUFAO	E2	1st			53	9	2	2	1	2	7
91	2	DHM	M3	150	TUFAO	E2	1st			91	7	2	2	1	1	6
34	2	DHM	M4	240	TUFAO	E2	1st			34	2	1	0	1	0	2
135	3	DHM	M1	0	TURQUESA	E2	1st			135	0	0	0	0	0	0
5	3	DHM	M2	120	TURQUESA	E2	1st			5	6	2	2	1	0	5
57	3	DHM	M3	150	TURQUESA	E2	1st			57	6	2	2	1	0	5
136	3	DHM	M4	240	TURQUESA	E2	1st			136	3	2	0	0	1	3
85	2	DHM	M1	0	MARJORIE	E2	1st			85	1	0	0	1	0	1
150	2	DHM	M2	120	MARJORIE	E2	1st			150	7	2	1	1	1	5
80	2	DHM	M3	150	MARJORIE	E2	1st			80	4	1	1	1	0	3
68	2	DHM	M4	240	MARJORIE	E2	1st			68	2	1	0	1	0	2
149	3	DHM	M1	0	PLANETA	E2	1st			149	3	1	0	1	1	3
40	3	DHM	M2	120	PLANETA	E2	1st			40	10	2	2	2	2	8
120	3	DHM	M3	150	PLANETA	E2	1st			120	10	2	2	2	2	8
33	3	DHM	M4	240	PLANETA	E2	1st			33	6	2	1	1	1	5
61	3	DHM	M1	0	PARIS.BELLS	E2	1st			61	2	1	0	1	0	2
157	3	DHM	M2	120	PARIS.BELLS	E2	1st			157	8	2	1	2	2	7
81	3	DHM	M3	150	PARIS.BELLS	E2	1st			81	8	2	2	1	1	6
13	3	DHM	M4	240	PARIS.BELLS	E2	1st			13	2	0	0	1	0	1
75	5	ACPL	M1	0	MARJORIE	E2	1st			75	2	1	0	1	0	2
107	5	ACPL	M2	60	MARJORIE	E2	1st			107	6	1	1	2	1	5
159	5	ACPL	M3	90	MARJORIE	E2	1st			159	6	2	1	1	0	4
52	5	ACPL	M4	120	MARJORIE	E2	1st			52	6	2	1	2	0	5
124	5	ACPL	M1	0	TURQUESA	E2	1st			124	1	1	0	0	0	1
113	5	ACPL	M2	60	TURQUESA	E2	1st			113	3	1	1	1	0	3
82	5	ACPL	M3	90	TURQUESA	E2	1st			82	3	1	1	1	0	3
44	5	ACPL	M4	120	TURQUESA	E2	1st			44	5	1	2	1	0	4
121	5	ACPL	M1	0	PARIS.BELLS	E2	1st			121	1	0	0	1	0	1
18	5	ACPL	M2	60	PARIS.BELLS	E2	1st			18	2	1	0	1	0	2
133	5	ACPL	M3	90	PARIS.BELLS	E2	1st			133	5	2	0	1	0	3
72	5	ACPL	M4	120	PARIS.BELLS	E2	1st			72	4	1	1	2	0	4
46	5	ACPL	M1	0	FAVORITO	E2	1st			46	4	2	0	0	1	3
2	5	ACPL	M2	60	FAVORITO	E2	1st			2	5	2	1	2	1	6
93	5	ACPL	M3	90	FAVORITO	E2	1st			93	6	2	1	1	0	4
90	5	ACPL	M4	120	FAVORITO	E2	1st			90	4	1	1	1	0	3
32	5	ACPL	M1	0	DIAMANTE	E2	1st			32	2	1	0	1	0	2
106	5	ACPL	M2	60	DIAMANTE	E2	1st			106	3	1	0	1	1	3
165	5	ACPL	M3	90	DIAMANTE	E2	1st			165	4	1	0	1	0	2
99	5	ACPL	M4	120	DIAMANTE	E2	1st			99	2	1	0	1	0	2
3	5	ACPL	M1	0	TUFAO	E2	1st			3	2	0	0	0	1	1
151	5	ACPL	M2	60	TUFAO	E2	1st			151	2	1	0	1	0	2
22	5	ACPL	M3	90	TUFAO	E2	1st			22	5	2	1	0	1	4
11	5	ACPL	M4	120	TUFAO	E2	1st			11	1	0	0	1	0	1
161	5	ACPL	M1	0	PLANETA	E2	1st			161	1	0	0	1	0	1
65	5	ACPL	M2	60	PLANETA	E2	1st			65	7	2	2	1	1	6
128	5	ACPL	M3	90	PLANETA	E2	1st			128	2	0	0	1	1	2
114	5	ACPL	M4	120	PLANETA	E2	1st			114	4	0	1	1	1	3
26	6	ACPH	M1	0	DIAMANTE	E2	1st			26	3	1	0	1	1	3
21	6	ACPH	M2	60	DIAMANTE	E2	1st			21	6	2	1	1	0	4
86	6	ACPH	M3	90	DIAMANTE	E2	1st			86	7	2	1	2	1	6
158	6	ACPH	M4	120	DIAMANTE	E2	1st			158	6	2	1	1	0	4
147	6	ACPH	M1	0	TUFAO	E2	1st			147	2	1	0	0	1	2
115	6	ACPH	M2	60	TUFAO	E2	1st			115	5	2	1	0	1	4
37	6	ACPH	M3	90	TUFAO	E2	1st			37	5	2	1	0	1	4
67	6	ACPH	M4	120	TUFAO	E2	1st			67	4	1	1	0	1	3
62	6	ACPH	M1	0	MARJORIE	E2	1st			62	2	1	0	1	0	2
73	6	ACPH	M2	60	MARJORIE	E2	1st			73	3	1	1	0	1	3
167	6	ACPH	M3	90	MARJORIE	E2	1st			167	5	1	1	1	1	4
10	6	ACPH	M4	120	MARJORIE	E2	1st			10	4	1	1	1	0	3
134	6	ACPH	M1	0	TURQUESA	E2	1st			134	1	1	0	0	0	1
146	6	ACPH	M2	60	TURQUESA	E2	1st			146	4	1	1	1	0	3
77	6	ACPH	M3	90	TURQUESA	E2	1st			77	4	1	1	1	0	3
28	6	ACPH	M4	120	TURQUESA	E2	1st			28	6	1	1	2	0	4
14	6	ACPH	M1	0	FAVORITO	E2	1st			14	5	1	1	2	0	4
131	6	ACPH	M2	60	FAVORITO	E2	1st			131	7	2	1	2	1	6
152	6	ACPH	M3	90	FAVORITO	E2	1st			152	7	2	2	1	1	6
132	6	ACPH	M4	120	FAVORITO	E2	1st			132	6	2	1	1	1	5
55	6	ACPH	M1	0	PLANETA	E2	1st			55	2	1	0	1	0	2
27	6	ACPH	M2	60	PLANETA	E2	1st			27	6	0	1	1	2	4
168	6	ACPH	M3	90	PLANETA	E2	1st			168	7	1	2	1	2	6
127	6	ACPH	M4	120	PLANETA	E2	1st			127	8	2	2	1	1	6
42	6	ACPH	M1	0	PARIS.BELLS	E2	1st			42	2	1	0	1	0	2
116	6	ACPH	M2	60	PARIS.BELLS	E2	1st			116	6	2	1	1	1	5
140	6	ACPH	M3	90	PARIS.BELLS	E2	1st			140	7	2	1	1	1	5
45	6	ACPH	M4	120	PARIS.BELLS	E2	1st			45	3	1	0	1	0	2
40	1	DL	M1	0	DIAMANTE	E2	2nd			40	4	2	1	1	0	4
28	1	DL	M2	120	DIAMANTE	E2	2nd			28	9	2	2	2	1	7
138	1	DL	M3	150	DIAMANTE	E2	2nd			138	5	2	1	1	0	4
168	1	DL	M4	240	DIAMANTE	E2	2nd			168	2	1	0	0	0	1
53	1	DL	M1	0	TUFAO	E2	2nd			53	3	1	0	0	1	2
34	1	DL	M2	120	TUFAO	E2	2nd			34	7	2	2	0	1	5
131	1	DL	M3	150	TUFAO	E2	2nd			131	6	2	1	0	1	4
19	1	DL	M4	240	TUFAO	E2	2nd			19	3	1	0	0	1	2
91	2	DL	M1	0	TURQUESA	E2	2nd			91	0	0	0	0	0	0
166	2	DL	M2	120	TURQUESA	E2	2nd			166	6	2	2	0	1	5
165	2	DL	M3	150	TURQUESA	E2	2nd			165	3	1	1	0	0	2
9	2	DL	M4	240	TURQUESA	E2	2nd			9	5	2	1	1	0	4
33	2	DL	M1	0	FAVORITO	E2	2nd			33	3	1	0	1	0	2
50	2	DL	M2	120	FAVORITO	E2	2nd			50	7	2	1	1	1	5
141	2	DL	M3	150	FAVORITO	E2	2nd			141	3	2	0	1	0	3
12	2	DL	M4	240	FAVORITO	E2	2nd			12	4	2	0	1	0	3
122	2	DL	M1	0	PARIS.BELLS	E2	2nd			122	3	1	0	1	0	2
23	2	DL	M2	120	PARIS.BELLS	E2	2nd			23	6	2	1	1	1	5
119	2	DL	M3	150	PARIS.BELLS	E2	2nd			119	6	2	1	1	0	4
88	2	DL	M4	240	PARIS.BELLS	E2	2nd			88	3	2	0	0	0	2
154	3	DL	M1	0	MARJORIE	E2	2nd			154	4	2	0	1	0	3
11	3	DL	M2	120	MARJORIE	E2	2nd			11	6	2	2	0	1	5
24	3	DL	M3	150	MARJORIE	E2	2nd			24	4	2	1	1	0	4
110	3	DL	M4	240	MARJORIE	E2	2nd			110	3	2	0	0	0	2
132	4	DL	M1	0	PLANETA	E2	2nd			132	0	0	0	0	0	0
32	4	DL	M2	120	PLANETA	E2	2nd			32	10	2	2	2	2	8
18	4	DL	M3	150	PLANETA	E2	2nd			18	8	2	2	1	2	7
118	4	DL	M4	240	PLANETA	E2	2nd			118	6	2	1	0	1	4
16	1	DH	M1	0	FAVORITO	E2	2nd			16	3	1	0	0	1	2
14	1	DH	M2	120	FAVORITO	E2	2nd			14	7	2	1	1	2	6
113	1	DH	M3	150	FAVORITO	E2	2nd			113	6	2	1	1	1	5
4	1	DH	M4	240	FAVORITO	E2	2nd			4	4	2	1	1	0	4
115	2	DH	M1	0	DIAMANTE	E2	2nd			115	3	2	0	0	0	2
106	2	DH	M2	120	DIAMANTE	E2	2nd			106	9	2	2	1	2	7
76	2	DH	M3	150	DIAMANTE	E2	2nd			76	6	2	1	1	1	5
62	2	DH	M4	240	DIAMANTE	E2	2nd			62	3	1	1	1	0	3
45	2	DH	M1	0	PLANETA	E2	2nd			45	2	0	0	1	0	1
29	2	DH	M2	120	PLANETA	E2	2nd			29	9	2	2	2	1	7
152	2	DH	M3	150	PLANETA	E2	2nd			152	9	2	2	1	2	7
100	2	DH	M4	240	PLANETA	E2	2nd			100	4	1	1	0	1	3
93	4	DH	M1	0	TURQUESA	E2	2nd			93	3	2	0	1	0	3
25	4	DH	M2	120	TURQUESA	E2	2nd			25	7	2	1	1	1	5
102	4	DH	M3	150	TURQUESA	E2	2nd			102	5	2	1	1	0	4
97	4	DH	M4	240	TURQUESA	E2	2nd			97	2	1	0	0	0	1
68	4	DH	M1	0	PARIS.BELLS	E2	2nd			68	2	1	0	1	0	2
126	4	DH	M2	120	PARIS.BELLS	E2	2nd			126	8	2	2	1	1	6
167	4	DH	M3	150	PARIS.BELLS	E2	2nd			167	8	2	2	1	2	7
83	4	DH	M4	240	PARIS.BELLS	E2	2nd			83	4	2	0	0	1	3
3	4	DH	M1	0	TUFAO	E2	2nd			3	3	1	0	0	1	2
111	4	DH	M2	120	TUFAO	E2	2nd			111	8	2	2	1	2	7
65	4	DH	M3	150	TUFAO	E2	2nd			65	7	2	2	0	1	5
38	4	DH	M4	240	TUFAO	E2	2nd			38	3	2	0	0	1	3
36	4	DH	M1	0	MARJORIE	E2	2nd			36	4	2	1	1	0	4
17	4	DH	M2	120	MARJORIE	E2	2nd			17	7	2	2	1	1	6
146	4	DH	M3	150	MARJORIE	E2	2nd			146	6	2	1	0	1	4
82	4	DH	M4	240	MARJORIE	E2	2nd			82	3	1	0	1	0	2
156	1	DLM	M1	0	MARJORIE	E2	2nd			156	4	2	0	1	0	3
101	1	DLM	M2	120	MARJORIE	E2	2nd			101	6	2	2	1	0	5
103	1	DLM	M3	150	MARJORIE	E2	2nd			103	6	2	1	1	0	4
72	1	DLM	M4	240	MARJORIE	E2	2nd			72	3	1	0	1	0	2
109	1	DLM	M1	0	PARIS.BELLS	E2	2nd			109	3	1	0	1	0	2
117	1	DLM	M2	120	PARIS.BELLS	E2	2nd			117	6	2	1	1	0	4
161	1	DLM	M3	150	PARIS.BELLS	E2	2nd			161	3	1	0	0	1	2
89	1	DLM	M4	240	PARIS.BELLS	E2	2nd			89	3	1	1	0	0	2
78	3	DLM	M1	0	DIAMANTE	E2	2nd			78	4	2	0	1	0	3
48	3	DLM	M2	120	DIAMANTE	E2	2nd			48	8	2	2	1	2	7
60	3	DLM	M3	150	DIAMANTE	E2	2nd			60	4	1	1	1	0	3
5	3	DLM	M4	240	DIAMANTE	E2	2nd			5	5	2	0	1	1	4
134	3	DLM	M1	0	FAVORITO	E2	2nd			134	3	2	0	1	0	3
1	3	DLM	M2	120	FAVORITO	E2	2nd			1	5	2	1	0	1	4
155	3	DLM	M3	150	FAVORITO	E2	2nd			155	4	1	1	0	1	3
46	3	DLM	M4	240	FAVORITO	E2	2nd			46	3	2	0	0	1	3
39	1	DLM	M1	0	TURQUESA	E2	2nd			39	0	0	0	0	0	0
114	1	DLM	M2	120	TURQUESA	E2	2nd			114	5	2	1	1	0	4
157	1	DLM	M3	150	TURQUESA	E2	2nd			157	3	1	0	1	0	2
49	1	DLM	M4	240	TURQUESA	E2	2nd			49	0	0	0	0	0	0
63	1	DLM	M1	0	PLANETA	E2	2nd			63	3	1	0	1	0	2
137	1	DLM	M2	120	PLANETA	E2	2nd			137	8	2	2	2	1	7
67	1	DLM	M3	150	PLANETA	E2	2nd			67	7	2	2	1	1	6
135	1	DLM	M4	240	PLANETA	E2	2nd			135	3	1	1	0	1	3
6	3	DLM	M1	0	TUFAO	E2	2nd			6	2	0	0	0	1	1
51	3	DLM	M2	120	TUFAO	E2	2nd			51	7	2	2	0	1	5
99	3	DLM	M3	150	TUFAO	E2	2nd			99	5	2	1	0	1	4
27	3	DLM	M4	240	TUFAO	E2	2nd			27	3	1	0	0	1	2
148	4	DHM	M1	0	DIAMANTE	E2	2nd			148	5	1	1	2	0	4
7	4	DHM	M2	120	DIAMANTE	E2	2nd			7	9	2	2	2	2	8
90	4	DHM	M3	150	DIAMANTE	E2	2nd			90	7	2	2	1	1	6
136	4	DHM	M4	240	DIAMANTE	E2	2nd			136	5	2	1	0	1	4
85	4	DHM	M1	0	FAVORITO	E2	2nd			85	3	1	0	1	0	2
31	4	DHM	M2	120	FAVORITO	E2	2nd			31	7	2	2	0	1	5
26	4	DHM	M3	150	FAVORITO	E2	2nd			26	6	2	1	1	1	5
84	4	DHM	M4	240	FAVORITO	E2	2nd			84	4	2	0	0	1	3
47	2	DHM	M1	0	TUFAO	E2	2nd			47	2	0	0	1	0	1
56	2	DHM	M2	120	TUFAO	E2	2nd			56	9	2	2	1	2	7
64	2	DHM	M3	150	TUFAO	E2	2nd			64	8	2	2	1	1	6
153	2	DHM	M4	240	TUFAO	E2	2nd			153	2	0	0	0	1	1
58	3	DHM	M1	0	TURQUESA	E2	2nd			58	0	0	0	0	0	0
41	3	DHM	M2	120	TURQUESA	E2	2nd			41	8	2	2	1	1	6
71	3	DHM	M3	150	TURQUESA	E2	2nd			71	6	2	1	1	1	5
81	3	DHM	M4	240	TURQUESA	E2	2nd			81	3	1	1	0	0	2
129	2	DHM	M1	0	MARJORIE	E2	2nd			129	3	1	0	1	0	2
144	2	DHM	M2	120	MARJORIE	E2	2nd			144	7	2	1	1	1	5
120	2	DHM	M3	150	MARJORIE	E2	2nd			120	5	2	1	1	0	4
35	2	DHM	M4	240	MARJORIE	E2	2nd			35	3	1	0	1	0	2
42	3	DHM	M1	0	PLANETA	E2	2nd			42	2	0	0	0	1	1
95	3	DHM	M2	120	PLANETA	E2	2nd			95	10	2	2	2	2	8
87	3	DHM	M3	150	PLANETA	E2	2nd			87	10	2	2	2	2	8
61	3	DHM	M4	240	PLANETA	E2	2nd			61	6	2	1	0	1	4
145	3	DHM	M1	0	PARIS.BELLS	E2	2nd			145	3	1	0	1	0	2
96	3	DHM	M2	120	PARIS.BELLS	E2	2nd			96	8	2	1	2	2	7
74	3	DHM	M3	150	PARIS.BELLS	E2	2nd			74	8	2	2	1	1	6
80	3	DHM	M4	240	PARIS.BELLS	E2	2nd			80	3	1	0	1	0	2
13	5	ACPL	M1	0	MARJORIE	E2	2nd			13	5	2	1	1	0	4
125	5	ACPL	M2	60	MARJORIE	E2	2nd			125	5	2	1	1	1	5
139	5	ACPL	M3	90	MARJORIE	E2	2nd			139	6	2	1	1	1	5
124	5	ACPL	M4	120	MARJORIE	E2	2nd			124	5	2	1	1	1	5
133	5	ACPL	M1	0	TURQUESA	E2	2nd			133	1	1	0	0	0	1
86	5	ACPL	M2	60	TURQUESA	E2	2nd			86	4	2	1	1	0	4
79	5	ACPL	M3	90	TURQUESA	E2	2nd			79	4	1	1	1	0	3
98	5	ACPL	M4	120	TURQUESA	E2	2nd			98	4	1	1	1	0	3
43	5	ACPL	M1	0	PARIS.BELLS	E2	2nd			43	3	1	0	1	0	2
57	5	ACPL	M2	60	PARIS.BELLS	E2	2nd			57	5	2	1	1	0	4
77	5	ACPL	M3	90	PARIS.BELLS	E2	2nd			77	5	2	1	1	0	4
163	5	ACPL	M4	120	PARIS.BELLS	E2	2nd			163	5	2	1	1	0	4
15	5	ACPL	M1	0	FAVORITO	E2	2nd			15	4	2	0	0	1	3
21	5	ACPL	M2	60	FAVORITO	E2	2nd			21	5	2	1	1	0	4
116	5	ACPL	M3	90	FAVORITO	E2	2nd			116	5	2	1	1	0	4
162	5	ACPL	M4	120	FAVORITO	E2	2nd			162	6	2	1	1	1	5
150	5	ACPL	M1	0	DIAMANTE	E2	2nd			150	2	1	0	1	0	2
121	5	ACPL	M2	60	DIAMANTE	E2	2nd			121	3	1	0	1	0	2
108	5	ACPL	M3	90	DIAMANTE	E2	2nd			108	4	2	0	1	0	3
55	5	ACPL	M4	120	DIAMANTE	E2	2nd			55	4	1	0	1	1	3
158	5	ACPL	M1	0	TUFAO	E2	2nd			158	0	0	0	0	0	0
66	5	ACPL	M2	60	TUFAO	E2	2nd			66	4	1	1	0	1	3
104	5	ACPL	M3	90	TUFAO	E2	2nd			104	5	2	1	0	1	4
2	5	ACPL	M4	120	TUFAO	E2	2nd			2	2	0	0	0	1	1
105	5	ACPL	M1	0	PLANETA	E2	2nd			105	3	1	0	1	0	2
92	5	ACPL	M2	60	PLANETA	E2	2nd			92	8	2	2	1	1	6
30	5	ACPL	M3	90	PLANETA	E2	2nd			30	4	0	1	1	1	3
73	5	ACPL	M4	120	PLANETA	E2	2nd			73	4	0	1	1	1	3
37	6	ACPH	M1	0	DIAMANTE	E2	2nd			37	4	2	1	0	1	4
107	6	ACPH	M2	60	DIAMANTE	E2	2nd			107	6	2	1	1	0	4
20	6	ACPH	M3	90	DIAMANTE	E2	2nd			20	7	2	1	2	1	6
70	6	ACPH	M4	120	DIAMANTE	E2	2nd			70	6	2	1	1	1	5
142	6	ACPH	M1	0	TUFAO	E2	2nd			142	2	1	0	0	0	1
127	6	ACPH	M2	60	TUFAO	E2	2nd			127	7	2	2	0	1	5
140	6	ACPH	M3	90	TUFAO	E2	2nd			140	5	2	1	0	1	4
112	6	ACPH	M4	120	TUFAO	E2	2nd			112	4	1	1	0	1	3
164	6	ACPH	M1	0	MARJORIE	E2	2nd			164	4	2	0	1	0	3
22	6	ACPH	M2	60	MARJORIE	E2	2nd			22	4	1	1	0	1	3
159	6	ACPH	M3	90	MARJORIE	E2	2nd			159	5	1	1	1	1	4
143	6	ACPH	M4	120	MARJORIE	E2	2nd			143	4	1	1	1	0	3
151	6	ACPH	M1	0	TURQUESA	E2	2nd			151	2	1	0	0	0	1
59	6	ACPH	M2	60	TURQUESA	E2	2nd			59	5	1	1	1	1	4
160	6	ACPH	M3	90	TURQUESA	E2	2nd			160	4	1	1	1	0	3
52	6	ACPH	M4	120	TURQUESA	E2	2nd			52	5	2	1	1	0	4
8	6	ACPH	M1	0	FAVORITO	E2	2nd			8	5	2	1	1	0	4
94	6	ACPH	M2	60	FAVORITO	E2	2nd			94	6	2	1	1	1	5
149	6	ACPH	M3	90	FAVORITO	E2	2nd			149	7	2	2	1	1	6
123	6	ACPH	M4	120	FAVORITO	E2	2nd			123	5	2	1	1	0	4
69	6	ACPH	M1	0	PLANETA	E2	2nd			69	2	1	0	1	0	2
54	6	ACPH	M2	60	PLANETA	E2	2nd			54	6	1	2	0	1	4
44	6	ACPH	M3	90	PLANETA	E2	2nd			44	8	2	2	1	1	6
75	6	ACPH	M4	120	PLANETA	E2	2nd			75	8	2	2	1	1	6
130	6	ACPH	M1	0	PARIS.BELLS	E2	2nd			130	3	1	0	1	0	2
128	6	ACPH	M2	60	PARIS.BELLS	E2	2nd			128	7	2	1	1	1	5
10	6	ACPH	M3	90	PARIS.BELLS	E2	2nd			10	7	2	1	1	2	6
147	6	ACPH	M4	120	PARIS.BELLS	E2	2nd			147	5	1	1	1	1	4
145	1	DL	M1	0	DIAMANTE	E3	1st			145	3	2	1	1	0	4
49	1	DL	M2	120	DIAMANTE	E3	1st			49	10	2	2	2	2	8
164	1	DL	M3	150	DIAMANTE	E3	1st			164	4	1	1	1	0	3
71	1	DL	M4	240	DIAMANTE	E3	1st			71	1	1	0	1	1	3
17	1	DL	M1	0	TUFAO	E3	1st			17	4	1	1	1	2	5
141	1	DL	M2	120	TUFAO	E3	1st			141	8	2	2	2	2	8
142	1	DL	M3	150	TUFAO	E3	1st			142	5	2	2	1	2	7
122	1	DL	M4	240	TUFAO	E3	1st			122	3	1	1	0	1	3
63	2	DL	M1	0	TURQUESA	E3	1st			63	2	2	1	1	0	4
154	2	DL	M2	120	TURQUESA	E3	1st			154	7	2	2	2	1	7
48	2	DL	M3	150	TURQUESA	E3	1st			48	4	2	1	1	1	5
43	2	DL	M4	240	TURQUESA	E3	1st			43	3	2	1	1	0	4
31	2	DL	M1	0	FAVORITO	E3	1st			31	2	1	0	1	0	2
76	2	DL	M2	120	FAVORITO	E3	1st			76	9	2	2	2	2	8
59	2	DL	M3	150	FAVORITO	E3	1st			59	2	1	1	1	1	4
19	2	DL	M4	240	FAVORITO	E3	1st			19	2	1	0	2	1	4
94	2	DL	M1	0	PARIS.BELLS	E3	1st			94	1	1	0	1	0	2
16	2	DL	M2	120	PARIS.BELLS	E3	1st			16	9	2	1	2	2	7
156	2	DL	M3	150	PARIS.BELLS	E3	1st			156	3	1	1	2	0	4
29	2	DL	M4	240	PARIS.BELLS	E3	1st			29	3	1	1	1	2	5
148	3	DL	M1	0	MARJORIE	E3	1st			148	0	1	0	1	0	2
98	3	DL	M2	120	MARJORIE	E3	1st			98	8	2	2	2	2	8
12	3	DL	M3	150	MARJORIE	E3	1st			12	7	2	1	2	1	6
87	3	DL	M4	240	MARJORIE	E3	1st			87	3	2	0	0	0	2
35	4	DL	M1	0	PLANETA	E3	1st			35	4	1	1	1	1	4
160	4	DL	M2	120	PLANETA	E3	1st			160	10	2	2	2	2	8
54	4	DL	M3	150	PLANETA	E3	1st			54	10	2	2	2	2	8
47	4	DL	M4	240	PLANETA	E3	1st			47	4	1	1	1	2	5
119	1	DH	M1	0	FAVORITO	E3	1st			119	0	0	0	0	0	0
69	1	DH	M2	120	FAVORITO	E3	1st			69	9	2	2	2	2	8
78	1	DH	M3	150	FAVORITO	E3	1st			78	6	2	1	2	2	7
137	1	DH	M4	240	FAVORITO	E3	1st			137	2	1	1	0	0	2
50	2	DH	M1	0	DIAMANTE	E3	1st			50	1	1	1	1	0	3
92	2	DH	M2	120	DIAMANTE	E3	1st			92	10	2	2	2	2	8
70	2	DH	M3	150	DIAMANTE	E3	1st			70	7	2	2	2	2	8
112	2	DH	M4	240	DIAMANTE	E3	1st			112	2	1	1	0	0	2
166	2	DH	M1	0	PLANETA	E3	1st			166	0	0	0	1	0	1
15	2	DH	M2	120	PLANETA	E3	1st			15	10	2	2	2	2	8
163	2	DH	M3	150	PLANETA	E3	1st			163	10	2	2	2	2	8
41	2	DH	M4	240	PLANETA	E3	1st			41	8	2	1	2	2	7
1	4	DH	M1	0	TURQUESA	E3	1st			1	5	1	1	1	0	3
89	4	DH	M2	120	TURQUESA	E3	1st			89	9	2	2	2	2	8
79	4	DH	M3	150	TURQUESA	E3	1st			79	7	2	2	2	2	8
9	4	DH	M4	240	TURQUESA	E3	1st			9	1	1	0	1	0	2
101	4	DH	M1	0	PARIS.BELLS	E3	1st			101	0	0	0	1	0	1
125	4	DH	M2	120	PARIS.BELLS	E3	1st			125	10	2	2	2	2	8
138	4	DH	M3	150	PARIS.BELLS	E3	1st			138	10	2	2	2	2	8
129	4	DH	M4	240	PARIS.BELLS	E3	1st			129	2	1	1	0	0	2
38	4	DH	M1	0	TUFAO	E3	1st			38	3	1	1	1	1	4
64	4	DH	M2	120	TUFAO	E3	1st			64	10	2	2	2	2	8
4	4	DH	M3	150	TUFAO	E3	1st			4	10	2	2	2	2	8
105	4	DH	M4	240	TUFAO	E3	1st			105	2	0	0	0	0	0
74	4	DH	M1	0	MARJORIE	E3	1st			74	2	2	1	2	1	6
6	4	DH	M2	120	MARJORIE	E3	1st			6	10	2	2	2	2	8
88	4	DH	M3	150	MARJORIE	E3	1st			88	7	2	2	2	2	8
30	4	DH	M4	240	MARJORIE	E3	1st			30	3	1	1	1	1	4
56	1	DLM	M1	0	MARJORIE	E3	1st			56	0	1	0	0	0	1
155	1	DLM	M2	120	MARJORIE	E3	1st			155	7	2	2	2	2	8
103	1	DLM	M3	150	MARJORIE	E3	1st			103	5	1	1	2	1	5
130	1	DLM	M4	240	MARJORIE	E3	1st			130	2	1	0	0	0	1
153	1	DLM	M1	0	PARIS.BELLS	E3	1st			153	0	0	0	1	0	1
102	1	DLM	M2	120	PARIS.BELLS	E3	1st			102	7	2	2	2	2	8
109	1	DLM	M3	150	PARIS.BELLS	E3	1st			109	1	1	0	0	0	1
83	1	DLM	M4	240	PARIS.BELLS	E3	1st			83	1	1	1	2	0	4
110	3	DLM	M1	0	DIAMANTE	E3	1st			110	4	1	1	2	1	5
108	3	DLM	M2	120	DIAMANTE	E3	1st			108	10	2	2	2	2	8
97	3	DLM	M3	150	DIAMANTE	E3	1st			97	6	2	2	1	1	6
25	3	DLM	M4	240	DIAMANTE	E3	1st			25	5	1	1	1	1	4
117	3	DLM	M1	0	FAVORITO	E3	1st			117	0	1	0	1	0	2
20	3	DLM	M2	120	FAVORITO	E3	1st			20	5	2	1	1	1	5
36	3	DLM	M3	150	FAVORITO	E3	1st			36	4	2	1	1	2	6
60	3	DLM	M4	240	FAVORITO	E3	1st			60	1	1	0	0	0	1
23	1	DLM	M1	0	TURQUESA	E3	1st			23	2	1	1	1	0	3
7	1	DLM	M2	120	TURQUESA	E3	1st			7	7	2	1	1	1	5
39	1	DLM	M3	150	TURQUESA	E3	1st			39	3	2	1	1	0	4
95	1	DLM	M4	240	TURQUESA	E3	1st			95	1	1	0	0	0	1
126	1	DLM	M1	0	PLANETA	E3	1st			126	4	1	1	1	1	4
123	1	DLM	M2	120	PLANETA	E3	1st			123	10	2	2	2	2	8
96	1	DLM	M3	150	PLANETA	E3	1st			96	10	2	2	2	2	8
58	1	DLM	M4	240	PLANETA	E3	1st			58	5	2	1	1	2	6
66	3	DLM	M1	0	TUFAO	E3	1st			66	1	0	1	0	0	1
118	3	DLM	M2	120	TUFAO	E3	1st			118	8	2	2	2	2	8
84	3	DLM	M3	150	TUFAO	E3	1st			84	6	2	2	1	1	6
144	3	DLM	M4	240	TUFAO	E3	1st			144	3	1	0	0	2	3
162	4	DHM	M1	0	DIAMANTE	E3	1st			162	3	1	1	2	0	4
139	4	DHM	M2	120	DIAMANTE	E3	1st			139	10	2	2	2	2	8
111	4	DHM	M3	150	DIAMANTE	E3	1st			111	8	2	2	2	2	8
143	4	DHM	M4	240	DIAMANTE	E3	1st			143	4	2	1	1	1	5
51	4	DHM	M1	0	FAVORITO	E3	1st			51	2	2	0	1	1	4
24	4	DHM	M2	120	FAVORITO	E3	1st			24	10	2	2	2	2	8
100	4	DHM	M3	150	FAVORITO	E3	1st			100	9	2	2	2	2	8
8	4	DHM	M4	240	FAVORITO	E3	1st			8	5	2	1	1	1	5
104	2	DHM	M1	0	TUFAO	E3	1st			104	0	0	0	0	0	0
53	2	DHM	M2	120	TUFAO	E3	1st			53	10	2	2	2	2	8
91	2	DHM	M3	150	TUFAO	E3	1st			91	8	2	2	2	2	8
34	2	DHM	M4	240	TUFAO	E3	1st			34	3	1	1	1	2	5
135	3	DHM	M1	0	TURQUESA	E3	1st			135	0	1	0	0	0	1
5	3	DHM	M2	120	TURQUESA	E3	1st			5	10	2	2	2	2	8
57	3	DHM	M3	150	TURQUESA	E3	1st			57	8	2	2	2	2	8
136	3	DHM	M4	240	TURQUESA	E3	1st			136	3	1	1	1	0	3
85	2	DHM	M1	0	MARJORIE	E3	1st			85	1	1	0	1	0	2
150	2	DHM	M2	120	MARJORIE	E3	1st			150	7	2	1	2	2	7
80	2	DHM	M3	150	MARJORIE	E3	1st			80	6	2	1	2	1	6
68	2	DHM	M4	240	MARJORIE	E3	1st			68	2	1	0	0	0	1
149	3	DHM	M1	0	PLANETA	E3	1st			149	3	1	0	1	1	3
40	3	DHM	M2	120	PLANETA	E3	1st			40	10	2	2	2	2	8
120	3	DHM	M3	150	PLANETA	E3	1st			120	10	2	2	2	2	8
33	3	DHM	M4	240	PLANETA	E3	1st			33	5	1	1	1	2	5
61	3	DHM	M1	0	PARIS.BELLS	E3	1st			61	0	0	0	1	0	1
157	3	DHM	M2	120	PARIS.BELLS	E3	1st			157	10	2	2	2	2	8
81	3	DHM	M3	150	PARIS.BELLS	E3	1st			81	10	2	2	2	2	8
13	3	DHM	M4	240	PARIS.BELLS	E3	1st			13	2	1	0	1	1	3
75	5	ACPL	M1	0	MARJORIE	E3	1st			75	3	2	1	1	1	5
107	5	ACPL	M2	60	MARJORIE	E3	1st			107	5	1	1	2	2	6
159	5	ACPL	M3	90	MARJORIE	E3	1st			159	6	2	1	2	1	6
52	5	ACPL	M4	120	MARJORIE	E3	1st			52	7	2	1	2	2	7
124	5	ACPL	M1	0	TURQUESA	E3	1st			124	0	0	0	0	0	0
113	5	ACPL	M2	60	TURQUESA	E3	1st			113	3	2	1	2	1	6
82	5	ACPL	M3	90	TURQUESA	E3	1st			82	6	2	2	2	1	7
44	5	ACPL	M4	120	TURQUESA	E3	1st			44	5	2	1	2	1	6
121	5	ACPL	M1	0	PARIS.BELLS	E3	1st			121	1	1	0	1	0	2
18	5	ACPL	M2	60	PARIS.BELLS	E3	1st			18	3	1	1	2	1	5
133	5	ACPL	M3	90	PARIS.BELLS	E3	1st			133	4	2	1	2	1	6
72	5	ACPL	M4	120	PARIS.BELLS	E3	1st			72	5	2	1	2	2	7
46	5	ACPL	M1	0	FAVORITO	E3	1st			46	2	2	1	1	1	5
2	5	ACPL	M2	60	FAVORITO	E3	1st			2	8	2	2	2	2	8
93	5	ACPL	M3	90	FAVORITO	E3	1st			93	4	2	1	2	2	7
90	5	ACPL	M4	120	FAVORITO	E3	1st			90	4	1	1	2	1	5
32	5	ACPL	M1	0	DIAMANTE	E3	1st			32	2	1	0	1	0	2
106	5	ACPL	M2	60	DIAMANTE	E3	1st			106	3	1	0	2	2	5
165	5	ACPL	M3	90	DIAMANTE	E3	1st			165	4	1	1	2	1	5
99	5	ACPL	M4	120	DIAMANTE	E3	1st			99	0	0	0	1	0	1
3	5	ACPL	M1	0	TUFAO	E3	1st			3	1	0	0	0	0	0
151	5	ACPL	M2	60	TUFAO	E3	1st			151	4	1	1	1	2	5
22	5	ACPL	M3	90	TUFAO	E3	1st			22	7	1	1	1	1	4
11	5	ACPL	M4	120	TUFAO	E3	1st			11	4	1	1	0	0	2
161	5	ACPL	M1	0	PLANETA	E3	1st			161	0	0	0	1	0	1
65	5	ACPL	M2	60	PLANETA	E3	1st			65	10	2	2	2	2	8
128	5	ACPL	M3	90	PLANETA	E3	1st			128	5	0	1	1	1	3
114	5	ACPL	M4	120	PLANETA	E3	1st			114	5	1	1	1	2	5
26	6	ACPH	M1	0	DIAMANTE	E3	1st			26	4	2	1	1	1	5
21	6	ACPH	M2	60	DIAMANTE	E3	1st			21	6	2	1	2	2	7
86	6	ACPH	M3	90	DIAMANTE	E3	1st			86	8	2	2	2	2	8
158	6	ACPH	M4	120	DIAMANTE	E3	1st			158	5	1	1	2	1	5
147	6	ACPH	M1	0	TUFAO	E3	1st			147	2	1	0	0	0	1
115	6	ACPH	M2	60	TUFAO	E3	1st			115	7	2	1	1	2	6
37	6	ACPH	M3	90	TUFAO	E3	1st			37	5	2	1	1	2	6
67	6	ACPH	M4	120	TUFAO	E3	1st			67	6	1	1	1	2	5
62	6	ACPH	M1	0	MARJORIE	E3	1st			62	2	2	1	1	1	5
73	6	ACPH	M2	60	MARJORIE	E3	1st			73	5	2	2	1	1	6
167	6	ACPH	M3	90	MARJORIE	E3	1st			167	5	1	1	1	2	5
10	6	ACPH	M4	120	MARJORIE	E3	1st			10	5	1	1	2	2	6
134	6	ACPH	M1	0	TURQUESA	E3	1st			134	1	1	0	0	0	1
146	6	ACPH	M2	60	TURQUESA	E3	1st			146	6	1	1	2	1	5
77	6	ACPH	M3	90	TURQUESA	E3	1st			77	5	1	2	2	1	6
28	6	ACPH	M4	120	TURQUESA	E3	1st			28	6	2	2	2	1	7
14	6	ACPH	M1	0	FAVORITO	E3	1st			14	4	1	1	2	1	5
131	6	ACPH	M2	60	FAVORITO	E3	1st			131	7	2	2	2	2	8
152	6	ACPH	M3	90	FAVORITO	E3	1st			152	7	2	2	2	2	8
132	6	ACPH	M4	120	FAVORITO	E3	1st			132	3	2	1	2	1	6
55	6	ACPH	M1	0	PLANETA	E3	1st			55	2	1	1	1	1	4
27	6	ACPH	M2	60	PLANETA	E3	1st			27	8	1	2	2	2	7
168	6	ACPH	M3	90	PLANETA	E3	1st			168	9	2	2	2	2	8
127	6	ACPH	M4	120	PLANETA	E3	1st			127	9	2	2	2	2	8
42	6	ACPH	M1	0	PARIS.BELLS	E3	1st			42	3	1	1	2	1	5
116	6	ACPH	M2	60	PARIS.BELLS	E3	1st			116	6	2	1	2	2	7
140	6	ACPH	M3	90	PARIS.BELLS	E3	1st			140	5	2	1	1	1	5
45	6	ACPH	M4	120	PARIS.BELLS	E3	1st			45	6	2	1	2	1	6
40	1	DL	M1	0	DIAMANTE	E3	2nd			40	3	1	1	1	0	3
28	1	DL	M2	120	DIAMANTE	E3	2nd			28	10	2	2	2	2	8
138	1	DL	M3	150	DIAMANTE	E3	2nd			138	3	1	1	2	1	5
168	1	DL	M4	240	DIAMANTE	E3	2nd			168	1	0	0	0	0	0
53	1	DL	M1	0	TUFAO	E3	2nd			53	4	1	1	0	1	3
34	1	DL	M2	120	TUFAO	E3	2nd			34	7	2	2	1	1	6
131	1	DL	M3	150	TUFAO	E3	2nd			131	5	1	1	0	0	2
19	1	DL	M4	240	TUFAO	E3	2nd			19	4	1	1	0	1	3
91	2	DL	M1	0	TURQUESA	E3	2nd			91	2	1	0	1	0	2
166	2	DL	M2	120	TURQUESA	E3	2nd			166	7	2	2	1	0	5
165	2	DL	M3	150	TURQUESA	E3	2nd			165	4	1	1	0	0	2
9	2	DL	M4	240	TURQUESA	E3	2nd			9	4	1	1	1	0	3
33	2	DL	M1	0	FAVORITO	E3	2nd			33	2	0	0	1	0	1
50	2	DL	M2	120	FAVORITO	E3	2nd			50	7	2	1	2	2	7
141	2	DL	M3	150	FAVORITO	E3	2nd			141	2	1	0	1	0	2
12	2	DL	M4	240	FAVORITO	E3	2nd			12	2	1	0	1	0	2
122	2	DL	M1	0	PARIS.BELLS	E3	2nd			122	1	0	0	0	0	0
23	2	DL	M2	120	PARIS.BELLS	E3	2nd			23	7	1	1	2	1	5
119	2	DL	M3	150	PARIS.BELLS	E3	2nd			119	5	1	1	1	1	4
88	2	DL	M4	240	PARIS.BELLS	E3	2nd			88	2	1	0	1	0	2
154	3	DL	M1	0	MARJORIE	E3	2nd			154	3	1	1	0	0	2
11	3	DL	M2	120	MARJORIE	E3	2nd			11	8	2	2	2	2	8
24	3	DL	M3	150	MARJORIE	E3	2nd			24	5	1	1	2	1	5
110	3	DL	M4	240	MARJORIE	E3	2nd			110	4	1	1	1	0	3
132	4	DL	M1	0	PLANETA	E3	2nd			132	2	0	0	0	0	0
32	4	DL	M2	120	PLANETA	E3	2nd			32	10	2	2	2	2	8
18	4	DL	M3	150	PLANETA	E3	2nd			18	10	2	2	2	2	8
118	4	DL	M4	240	PLANETA	E3	2nd			118	4	1	1	1	1	4
16	1	DH	M1	0	FAVORITO	E3	2nd			16	1	0	0	0	0	0
14	1	DH	M2	120	FAVORITO	E3	2nd			14	9	2	2	2	2	8
113	1	DH	M3	150	FAVORITO	E3	2nd			113	5	2	1	1	1	5
4	1	DH	M4	240	FAVORITO	E3	2nd			4	3	1	1	1	1	4
115	2	DH	M1	0	DIAMANTE	E3	2nd			115	1	0	0	0	0	0
106	2	DH	M2	120	DIAMANTE	E3	2nd			106	10	2	2	2	2	8
76	2	DH	M3	150	DIAMANTE	E3	2nd			76	4	1	1	1	1	4
62	2	DH	M4	240	DIAMANTE	E3	2nd			62	5	1	1	0	1	3
45	2	DH	M1	0	PLANETA	E3	2nd			45	1	0	0	1	0	1
29	2	DH	M2	120	PLANETA	E3	2nd			29	10	2	2	2	2	8
152	2	DH	M3	150	PLANETA	E3	2nd			152	10	1	2	2	2	7
100	2	DH	M4	240	PLANETA	E3	2nd			100	5	1	1	1	0	3
93	4	DH	M1	0	TURQUESA	E3	2nd			93	3	1	0	1	0	2
25	4	DH	M2	120	TURQUESA	E3	2nd			25	8	2	2	2	1	7
102	4	DH	M3	150	TURQUESA	E3	2nd			102	6	2	1	2	1	6
97	4	DH	M4	240	TURQUESA	E3	2nd			97	1	0	0	0	0	0
68	4	DH	M1	0	PARIS.BELLS	E3	2nd			68	2	1	0	0	1	2
126	4	DH	M2	120	PARIS.BELLS	E3	2nd			126	9	2	2	2	2	8
167	4	DH	M3	150	PARIS.BELLS	E3	2nd			167	8	2	2	2	2	8
83	4	DH	M4	240	PARIS.BELLS	E3	2nd			83	2	1	0	0	0	1
3	4	DH	M1	0	TUFAO	E3	2nd			3	3	1	1	1	0	3
111	4	DH	M2	120	TUFAO	E3	2nd			111	10	2	2	2	2	8
65	4	DH	M3	150	TUFAO	E3	2nd			65	9	2	2	2	2	8
38	4	DH	M4	240	TUFAO	E3	2nd			38	3	1	1	0	0	2
36	4	DH	M1	0	MARJORIE	E3	2nd			36	3	1	1	2	1	5
17	4	DH	M2	120	MARJORIE	E3	2nd			17	10	2	2	2	2	8
146	4	DH	M3	150	MARJORIE	E3	2nd			146	6	2	2	1	1	6
82	4	DH	M4	240	MARJORIE	E3	2nd			82	2	0	0	1	0	1
156	1	DLM	M1	0	MARJORIE	E3	2nd			156	1	0	0	0	0	0
101	1	DLM	M2	120	MARJORIE	E3	2nd			101	7	2	2	2	2	8
103	1	DLM	M3	150	MARJORIE	E3	2nd			103	5	2	1	2	1	6
72	1	DLM	M4	240	MARJORIE	E3	2nd			72	3	1	1	1	0	3
109	1	DLM	M1	0	PARIS.BELLS	E3	2nd			109	1	0	0	1	0	1
117	1	DLM	M2	120	PARIS.BELLS	E3	2nd			117	6	2	1	1	1	5
161	1	DLM	M3	150	PARIS.BELLS	E3	2nd			161	2	1	1	0	0	2
89	1	DLM	M4	240	PARIS.BELLS	E3	2nd			89	2	0	0	1	0	1
78	3	DLM	M1	0	DIAMANTE	E3	2nd			78	2	1	0	1	0	2
48	3	DLM	M2	120	DIAMANTE	E3	2nd			48	10	2	2	2	2	8
60	3	DLM	M3	150	DIAMANTE	E3	2nd			60	6	1	1	1	1	4
5	3	DLM	M4	240	DIAMANTE	E3	2nd			5	3	1	0	1	1	3
134	3	DLM	M1	0	FAVORITO	E3	2nd			134	3	1	1	1	0	3
1	3	DLM	M2	120	FAVORITO	E3	2nd			1	4	1	1	1	1	4
155	3	DLM	M3	150	FAVORITO	E3	2nd			155	4	1	1	0	1	3
46	3	DLM	M4	240	FAVORITO	E3	2nd			46	1	0	0	0	0	0
39	1	DLM	M1	0	TURQUESA	E3	2nd			39	1	0	0	0	0	0
114	1	DLM	M2	120	TURQUESA	E3	2nd			114	5	2	1	1	0	4
157	1	DLM	M3	150	TURQUESA	E3	2nd			157	2	1	0	0	0	1
49	1	DLM	M4	240	TURQUESA	E3	2nd			49	2	0	0	0	0	0
63	1	DLM	M1	0	PLANETA	E3	2nd			63	3	0	1	1	1	3
137	1	DLM	M2	120	PLANETA	E3	2nd			137	9	2	2	2	2	8
67	1	DLM	M3	150	PLANETA	E3	2nd			67	7	2	2	1	2	7
135	1	DLM	M4	240	PLANETA	E3	2nd			135	4	1	1	0	1	3
6	3	DLM	M1	0	TUFAO	E3	2nd			6	2	0	1	0	1	2
51	3	DLM	M2	120	TUFAO	E3	2nd			51	7	2	2	1	2	7
99	3	DLM	M3	150	TUFAO	E3	2nd			99	6	1	1	1	1	4
27	3	DLM	M4	240	TUFAO	E3	2nd			27	3	1	1	0	1	3
148	4	DHM	M1	0	DIAMANTE	E3	2nd			148	2	0	1	1	0	2
7	4	DHM	M2	120	DIAMANTE	E3	2nd			7	10	2	2	2	2	8
90	4	DHM	M3	150	DIAMANTE	E3	2nd			90	10	2	2	2	2	8
136	4	DHM	M4	240	DIAMANTE	E3	2nd			136	3	1	1	0	1	3
85	4	DHM	M1	0	FAVORITO	E3	2nd			85	3	1	0	1	0	2
31	4	DHM	M2	120	FAVORITO	E3	2nd			31	9	2	2	1	2	7
26	4	DHM	M3	150	FAVORITO	E3	2nd			26	8	2	2	1	1	6
84	4	DHM	M4	240	FAVORITO	E3	2nd			84	3	1	0	0	0	1
47	2	DHM	M1	0	TUFAO	E3	2nd			47	1	0	0	0	0	0
56	2	DHM	M2	120	TUFAO	E3	2nd			56	10	2	2	2	2	8
64	2	DHM	M3	150	TUFAO	E3	2nd			64	8	2	2	2	2	8
153	2	DHM	M4	240	TUFAO	E3	2nd			153	2	0	1	0	1	2
58	3	DHM	M1	0	TURQUESA	E3	2nd			58	1	0	0	0	0	0
41	3	DHM	M2	120	TURQUESA	E3	2nd			41	9	2	2	2	1	7
71	3	DHM	M3	150	TURQUESA	E3	2nd			71	7	2	2	1	2	7
81	3	DHM	M4	240	TURQUESA	E3	2nd			81	3	1	1	1	0	3
129	2	DHM	M1	0	MARJORIE	E3	2nd			129	2	0	1	1	0	2
144	2	DHM	M2	120	MARJORIE	E3	2nd			144	7	2	2	2	2	8
120	2	DHM	M3	150	MARJORIE	E3	2nd			120	5	1	1	1	1	4
35	2	DHM	M4	240	MARJORIE	E3	2nd			35	1	0	0	0	0	0
42	3	DHM	M1	0	PLANETA	E3	2nd			42	1	0	0	0	0	0
95	3	DHM	M2	120	PLANETA	E3	2nd			95	10	2	2	2	2	8
87	3	DHM	M3	150	PLANETA	E3	2nd			87	10	2	2	2	2	8
61	3	DHM	M4	240	PLANETA	E3	2nd			61	4	0	1	1	1	3
145	3	DHM	M1	0	PARIS.BELLS	E3	2nd			145	1	0	0	1	0	1
96	3	DHM	M2	120	PARIS.BELLS	E3	2nd			96	9	2	2	2	2	8
74	3	DHM	M3	150	PARIS.BELLS	E3	2nd			74	9	2	2	2	2	8
80	3	DHM	M4	240	PARIS.BELLS	E3	2nd			80	1	0	0	0	0	0
13	5	ACPL	M1	0	MARJORIE	E3	2nd			13	3	1	1	1	1	4
125	5	ACPL	M2	60	MARJORIE	E3	2nd			125	5	1	1	2	1	5
139	5	ACPL	M3	90	MARJORIE	E3	2nd			139	6	1	1	2	2	6
124	5	ACPL	M4	120	MARJORIE	E3	2nd			124	5	2	1	2	1	6
133	5	ACPL	M1	0	TURQUESA	E3	2nd			133	2	1	1	0	0	2
86	5	ACPL	M2	60	TURQUESA	E3	2nd			86	5	1	1	2	0	4
79	5	ACPL	M3	90	TURQUESA	E3	2nd			79	6	1	1	1	0	3
98	5	ACPL	M4	120	TURQUESA	E3	2nd			98	5	0	1	1	0	2
43	5	ACPL	M1	0	PARIS.BELLS	E3	2nd			43	2	0	0	1	0	1
57	5	ACPL	M2	60	PARIS.BELLS	E3	2nd			57	5	1	1	1	1	4
77	5	ACPL	M3	90	PARIS.BELLS	E3	2nd			77	5	1	1	2	1	5
163	5	ACPL	M4	120	PARIS.BELLS	E3	2nd			163	4	1	1	1	0	3
15	5	ACPL	M1	0	FAVORITO	E3	2nd			15	2	1	0	0	1	2
21	5	ACPL	M2	60	FAVORITO	E3	2nd			21	7	1	1	2	1	5
116	5	ACPL	M3	90	FAVORITO	E3	2nd			116	4	1	1	1	1	4
162	5	ACPL	M4	120	FAVORITO	E3	2nd			162	4	1	1	2	1	5
150	5	ACPL	M1	0	DIAMANTE	E3	2nd			150	1	1	0	1	0	2
121	5	ACPL	M2	60	DIAMANTE	E3	2nd			121	3	1	1	1	1	4
108	5	ACPL	M3	90	DIAMANTE	E3	2nd			108	4	0	1	2	1	4
55	5	ACPL	M4	120	DIAMANTE	E3	2nd			55	2	0	0	1	1	2
158	5	ACPL	M1	0	TUFAO	E3	2nd			158	1	0	0	0	0	0
66	5	ACPL	M2	60	TUFAO	E3	2nd			66	5	1	1	1	2	5
104	5	ACPL	M3	90	TUFAO	E3	2nd			104	3	1	1	0	0	2
2	5	ACPL	M4	120	TUFAO	E3	2nd			2	1	0	0	0	0	0
105	5	ACPL	M1	0	PLANETA	E3	2nd			105	1	0	0	1	0	1
92	5	ACPL	M2	60	PLANETA	E3	2nd			92	10	2	2	2	2	8
30	5	ACPL	M3	90	PLANETA	E3	2nd			30	5	0	1	1	1	3
73	5	ACPL	M4	120	PLANETA	E3	2nd			73	5	0	1	1	1	3
37	6	ACPH	M1	0	DIAMANTE	E3	2nd			37	2	1	0	0	1	2
107	6	ACPH	M2	60	DIAMANTE	E3	2nd			107	5	2	1	2	1	6
20	6	ACPH	M3	90	DIAMANTE	E3	2nd			20	7	1	1	2	1	5
70	6	ACPH	M4	120	DIAMANTE	E3	2nd			70	5	1	1	2	1	5
142	6	ACPH	M1	0	TUFAO	E3	2nd			142	2	1	0	0	0	1
127	6	ACPH	M2	60	TUFAO	E3	2nd			127	7	1	2	1	1	5
140	6	ACPH	M3	90	TUFAO	E3	2nd			140	4	1	1	0	1	3
112	6	ACPH	M4	120	TUFAO	E3	2nd			112	6	1	1	1	0	3
164	6	ACPH	M1	0	MARJORIE	E3	2nd			164	3	1	0	1	0	2
22	6	ACPH	M2	60	MARJORIE	E3	2nd			22	6	1	1	1	1	4
159	6	ACPH	M3	90	MARJORIE	E3	2nd			159	4	1	1	1	1	4
143	6	ACPH	M4	120	MARJORIE	E3	2nd			143	3	0	1	1	0	2
151	6	ACPH	M1	0	TURQUESA	E3	2nd			151	3	1	1	0	0	2
59	6	ACPH	M2	60	TURQUESA	E3	2nd			59	6	1	1	2	1	5
160	6	ACPH	M3	90	TURQUESA	E3	2nd			160	4	1	1	1	0	3
52	6	ACPH	M4	120	TURQUESA	E3	2nd			52	6	1	1	2	0	4
8	6	ACPH	M1	0	FAVORITO	E3	2nd			8	4	1	1	2	1	5
94	6	ACPH	M2	60	FAVORITO	E3	2nd			94	7	2	1	2	2	7
149	6	ACPH	M3	90	FAVORITO	E3	2nd			149	7	2	2	2	1	7
123	6	ACPH	M4	120	FAVORITO	E3	2nd			123	6	2	2	2	1	7
69	6	ACPH	M1	0	PLANETA	E3	2nd			69	1	0	0	0	0	0
54	6	ACPH	M2	60	PLANETA	E3	2nd			54	6	0	1	1	1	3
44	6	ACPH	M3	90	PLANETA	E3	2nd			44	9	1	2	2	2	7
75	6	ACPH	M4	120	PLANETA	E3	2nd			75	7	1	2	2	1	6
130	6	ACPH	M1	0	PARIS.BELLS	E3	2nd			130	4	1	1	0	0	2
128	6	ACPH	M2	60	PARIS.BELLS	E3	2nd			128	7	1	1	1	1	4
10	6	ACPH	M3	90	PARIS.BELLS	E3	2nd			10	7	1	2	2	2	7
147	6	ACPH	M4	120	PARIS.BELLS	E3	2nd			147	4	1	1	1	0	3
145	1	DL	M1	0	DIAMANTE	E4	1st			145	3	1	0	1	0	2
49	1	DL	M2	120	DIAMANTE	E4	1st			49	7	2	2	1	1	6
164	1	DL	M3	150	DIAMANTE	E4	1st			164	3	1	1	1	0	3
71	1	DL	M4	240	DIAMANTE	E4	1st			71	2	0	0	0	0	0
17	1	DL	M1	0	TUFAO	E4	1st			17	3	1	1	0	1	3
141	1	DL	M2	120	TUFAO	E4	1st			141	6	1	2	0	1	4
142	1	DL	M3	150	TUFAO	E4	1st			142	5	1	1	0	1	3
122	1	DL	M4	240	TUFAO	E4	1st			122	2	1	0	0	1	2
63	2	DL	M1	0	TURQUESA	E4	1st			63	2	0	1	0	0	1
154	2	DL	M2	120	TURQUESA	E4	1st			154	6	1	2	1	0	4
48	2	DL	M3	150	TURQUESA	E4	1st			48	4	1	1	0	1	3
43	2	DL	M4	240	TURQUESA	E4	1st			43	3	2	1	0	1	4
31	2	DL	M1	0	FAVORITO	E4	1st			31	2	1	0	1	1	3
76	2	DL	M2	120	FAVORITO	E4	1st			76	7	2	1	1	1	5
59	2	DL	M3	150	FAVORITO	E4	1st			59	2	1	0	0	0	1
19	2	DL	M4	240	FAVORITO	E4	1st			19	3	1	0	1	0	2
94	2	DL	M1	0	PARIS.BELLS	E4	1st			94	2	0	0	0	0	0
16	2	DL	M2	120	PARIS.BELLS	E4	1st			16	6	2	1	1	1	5
156	2	DL	M3	150	PARIS.BELLS	E4	1st			156	3	1	1	1	0	3
29	2	DL	M4	240	PARIS.BELLS	E4	1st			29	2	1	0	1	1	3
148	3	DL	M1	0	MARJORIE	E4	1st			148	3	1	0	1	1	3
98	3	DL	M2	120	MARJORIE	E4	1st			98	5	2	1	1	2	6
12	3	DL	M3	150	MARJORIE	E4	1st			12	4	2	1	1	1	5
87	3	DL	M4	240	MARJORIE	E4	1st			87	3	1	0	1	0	2
35	4	DL	M1	0	PLANETA	E4	1st			35	2	0	0	0	0	0
160	4	DL	M2	120	PLANETA	E4	1st			160	10	2	2	2	2	8
54	4	DL	M3	150	PLANETA	E4	1st			54	7	2	1	1	2	6
47	4	DL	M4	240	PLANETA	E4	1st			47	5	1	1	1	2	5
119	1	DH	M1	0	FAVORITO	E4	1st			119	1	0	0	0	0	0
69	1	DH	M2	120	FAVORITO	E4	1st			69	6	2	1	2	2	7
78	1	DH	M3	150	FAVORITO	E4	1st			78	4	1	1	1	1	4
137	1	DH	M4	240	FAVORITO	E4	1st			137	3	1	1	0	0	2
50	2	DH	M1	0	DIAMANTE	E4	1st			50	3	1	1	0	0	2
92	2	DH	M2	120	DIAMANTE	E4	1st			92	8	1	2	2	2	7
70	2	DH	M3	150	DIAMANTE	E4	1st			70	4	1	1	1	1	4
112	2	DH	M4	240	DIAMANTE	E4	1st			112	3	1	1	1	1	4
166	2	DH	M1	0	PLANETA	E4	1st			166	0	0	0	1	0	1
15	2	DH	M2	120	PLANETA	E4	1st			15	10	2	2	2	2	8
163	2	DH	M3	150	PLANETA	E4	1st			163	8	1	2	2	2	7
41	2	DH	M4	240	PLANETA	E4	1st			41	3	1	1	0	1	3
1	4	DH	M1	0	TURQUESA	E4	1st			1	3	1	0	1	0	2
89	4	DH	M2	120	TURQUESA	E4	1st			89	7	2	2	1	1	6
79	4	DH	M3	150	TURQUESA	E4	1st			79	5	2	1	0	0	3
9	4	DH	M4	240	TURQUESA	E4	1st			9	1	0	0	0	0	0
101	4	DH	M1	0	PARIS.BELLS	E4	1st			101	2	1	0	1	0	2
125	4	DH	M2	120	PARIS.BELLS	E4	1st			125	9	2	2	2	2	8
138	4	DH	M3	150	PARIS.BELLS	E4	1st			138	7	2	2	1	1	6
129	4	DH	M4	240	PARIS.BELLS	E4	1st			129	3	1	1	0	0	2
38	4	DH	M1	0	TUFAO	E4	1st			38	2	0	0	0	1	1
64	4	DH	M2	120	TUFAO	E4	1st			64	8	2	2	1	1	6
4	4	DH	M3	150	TUFAO	E4	1st			4	7	2	2	1	2	7
105	4	DH	M4	240	TUFAO	E4	1st			105	3	1	0	0	0	1
74	4	DH	M1	0	MARJORIE	E4	1st			74	3	2	0	1	0	3
6	4	DH	M2	120	MARJORIE	E4	1st			6	9	2	2	2	2	8
88	4	DH	M3	150	MARJORIE	E4	1st			88	5	2	1	1	1	5
30	4	DH	M4	240	MARJORIE	E4	1st			30	2	0	0	0	1	1
56	1	DLM	M1	0	MARJORIE	E4	1st			56	1	0	0	0	0	0
155	1	DLM	M2	120	MARJORIE	E4	1st			155	6	1	2	0	0	3
103	1	DLM	M3	150	MARJORIE	E4	1st			103	4	1	1	1	0	3
130	1	DLM	M4	240	MARJORIE	E4	1st			130	3	1	0	0	0	1
153	1	DLM	M1	0	PARIS.BELLS	E4	1st			153	2	0	0	0	0	0
102	1	DLM	M2	120	PARIS.BELLS	E4	1st			102	4	2	1	1	0	4
109	1	DLM	M3	150	PARIS.BELLS	E4	1st			109	3	1	1	1	1	4
83	1	DLM	M4	240	PARIS.BELLS	E4	1st			83	2	1	0	0	0	1
110	3	DLM	M1	0	DIAMANTE	E4	1st			110	3	2	1	1	0	4
108	3	DLM	M2	120	DIAMANTE	E4	1st			108	7	2	1	1	1	5
97	3	DLM	M3	150	DIAMANTE	E4	1st			97	5	1	1	1	1	4
25	3	DLM	M4	240	DIAMANTE	E4	1st			25	2	1	0	0	0	1
117	3	DLM	M1	0	FAVORITO	E4	1st			117	4	1	1	1	0	3
20	3	DLM	M2	120	FAVORITO	E4	1st			20	4	2	1	0	1	4
36	3	DLM	M3	150	FAVORITO	E4	1st			36	3	1	1	0	1	3
60	3	DLM	M4	240	FAVORITO	E4	1st			60	2	1	0	0	1	2
23	1	DLM	M1	0	TURQUESA	E4	1st			23	1	0	0	0	0	0
7	1	DLM	M2	120	TURQUESA	E4	1st			7	4	1	1	0	0	2
39	1	DLM	M3	150	TURQUESA	E4	1st			39	2	1	0	0	0	1
95	1	DLM	M4	240	TURQUESA	E4	1st			95	1	0	0	0	0	0
126	1	DLM	M1	0	PLANETA	E4	1st			126	2	0	0	0	0	0
123	1	DLM	M2	120	PLANETA	E4	1st			123	7	1	2	2	2	7
96	1	DLM	M3	150	PLANETA	E4	1st			96	7	2	2	1	1	6
58	1	DLM	M4	240	PLANETA	E4	1st			58	4	1	1	1	1	4
66	3	DLM	M1	0	TUFAO	E4	1st			66	1	0	0	0	0	0
118	3	DLM	M2	120	TUFAO	E4	1st			118	6	2	1	0	1	4
84	3	DLM	M3	150	TUFAO	E4	1st			84	4	1	1	1	1	4
144	3	DLM	M4	240	TUFAO	E4	1st			144	3	1	0	0	1	2
162	4	DHM	M1	0	DIAMANTE	E4	1st			162	3	0	1	1	0	2
139	4	DHM	M2	120	DIAMANTE	E4	1st			139	9	2	2	2	2	8
111	4	DHM	M3	150	DIAMANTE	E4	1st			111	6	2	2	1	2	7
143	4	DHM	M4	240	DIAMANTE	E4	1st			143	3	1	1	0	0	2
51	4	DHM	M1	0	FAVORITO	E4	1st			51	2	1	0	0	0	1
24	4	DHM	M2	120	FAVORITO	E4	1st			24	8	2	2	1	2	7
100	4	DHM	M3	150	FAVORITO	E4	1st			100	7	2	1	1	2	6
8	4	DHM	M4	240	FAVORITO	E4	1st			8	3	1	0	1	1	3
104	2	DHM	M1	0	TUFAO	E4	1st			104	1	0	0	0	0	0
53	2	DHM	M2	120	TUFAO	E4	1st			53	8	2	2	1	2	7
91	2	DHM	M3	150	TUFAO	E4	1st			91	6	2	2	1	2	7
34	2	DHM	M4	240	TUFAO	E4	1st			34	3	0	0	0	2	2
135	3	DHM	M1	0	TURQUESA	E4	1st			135	1	0	0	0	0	0
5	3	DHM	M2	120	TURQUESA	E4	1st			5	8	2	2	2	2	8
57	3	DHM	M3	150	TURQUESA	E4	1st			57	6	2	2	1	1	6
136	3	DHM	M4	240	TURQUESA	E4	1st			136	2	0	1	0	0	1
85	2	DHM	M1	0	MARJORIE	E4	1st			85	2	1	0	1	0	2
150	2	DHM	M2	120	MARJORIE	E4	1st			150	4	2	1	0	1	4
80	2	DHM	M3	150	MARJORIE	E4	1st			80	4	1	1	1	1	4
68	2	DHM	M4	240	MARJORIE	E4	1st			68	2	1	0	0	0	1
149	3	DHM	M1	0	PLANETA	E4	1st			149	4	1	0	1	0	2
40	3	DHM	M2	120	PLANETA	E4	1st			40	9	2	2	2	2	8
120	3	DHM	M3	150	PLANETA	E4	1st			120	9	2	2	2	2	8
33	3	DHM	M4	240	PLANETA	E4	1st			33	4	1	1	1	2	5
61	3	DHM	M1	0	PARIS.BELLS	E4	1st			61	2	0	0	1	0	1
157	3	DHM	M2	120	PARIS.BELLS	E4	1st			157	8	2	2	2	2	8
81	3	DHM	M3	150	PARIS.BELLS	E4	1st			81	8	2	2	1	1	6
13	3	DHM	M4	240	PARIS.BELLS	E4	1st			13	3	0	0	1	1	2
75	5	ACPL	M1	0	MARJORIE	E4	1st			75	2	1	1	0	0	2
107	5	ACPL	M2	60	MARJORIE	E4	1st			107	3	1	1	1	0	3
159	5	ACPL	M3	90	MARJORIE	E4	1st			159	4	1	1	0	0	2
52	5	ACPL	M4	120	MARJORIE	E4	1st			52	4	2	1	1	1	5
124	5	ACPL	M1	0	TURQUESA	E4	1st			124	2	1	0	0	0	1
113	5	ACPL	M2	60	TURQUESA	E4	1st			113	3	1	1	1	0	3
82	5	ACPL	M3	90	TURQUESA	E4	1st			82	3	2	1	0	0	3
44	5	ACPL	M4	120	TURQUESA	E4	1st			44	4	1	1	0	0	2
121	5	ACPL	M1	0	PARIS.BELLS	E4	1st			121	2	0	0	1	0	1
18	5	ACPL	M2	60	PARIS.BELLS	E4	1st			18	3	1	1	0	0	2
133	5	ACPL	M3	90	PARIS.BELLS	E4	1st			133	3	1	1	0	0	2
72	5	ACPL	M4	120	PARIS.BELLS	E4	1st			72	4	2	1	1	1	5
46	5	ACPL	M1	0	FAVORITO	E4	1st			46	2	1	0	0	1	2
2	5	ACPL	M2	60	FAVORITO	E4	1st			2	6	1	1	1	1	4
93	5	ACPL	M3	90	FAVORITO	E4	1st			93	4	1	1	2	1	5
90	5	ACPL	M4	120	FAVORITO	E4	1st			90	3	1	1	1	1	4
32	5	ACPL	M1	0	DIAMANTE	E4	1st			32	2	1	0	1	0	2
106	5	ACPL	M2	60	DIAMANTE	E4	1st			106	3	1	1	1	1	4
165	5	ACPL	M3	90	DIAMANTE	E4	1st			165	3	1	1	1	0	3
99	5	ACPL	M4	120	DIAMANTE	E4	1st			99	3	1	1	0	0	2
3	5	ACPL	M1	0	TUFAO	E4	1st			3	2	0	0	0	1	1
151	5	ACPL	M2	60	TUFAO	E4	1st			151	3	1	1	0	1	3
22	5	ACPL	M3	90	TUFAO	E4	1st			22	3	1	1	0	0	2
11	5	ACPL	M4	120	TUFAO	E4	1st			11	2	0	0	0	1	1
161	5	ACPL	M1	0	PLANETA	E4	1st			161	2	0	0	0	0	0
65	5	ACPL	M2	60	PLANETA	E4	1st			65	8	1	2	1	1	5
128	5	ACPL	M3	90	PLANETA	E4	1st			128	3	0	1	1	1	3
114	5	ACPL	M4	120	PLANETA	E4	1st			114	5	0	1	1	2	4
26	6	ACPH	M1	0	DIAMANTE	E4	1st			26	3	1	0	0	1	2
21	6	ACPH	M2	60	DIAMANTE	E4	1st			21	3	2	1	1	0	4
86	6	ACPH	M3	90	DIAMANTE	E4	1st			86	6	2	1	2	1	6
158	6	ACPH	M4	120	DIAMANTE	E4	1st			158	5	1	1	1	0	3
147	6	ACPH	M1	0	TUFAO	E4	1st			147	2	1	0	0	0	1
115	6	ACPH	M2	60	TUFAO	E4	1st			115	5	1	1	1	1	4
37	6	ACPH	M3	90	TUFAO	E4	1st			37	3	2	1	0	1	4
67	6	ACPH	M4	120	TUFAO	E4	1st			67	4	1	1	1	1	4
62	6	ACPH	M1	0	MARJORIE	E4	1st			62	3	1	0	1	1	3
73	6	ACPH	M2	60	MARJORIE	E4	1st			73	4	2	1	0	0	3
167	6	ACPH	M3	90	MARJORIE	E4	1st			167	3	1	1	0	0	2
10	6	ACPH	M4	120	MARJORIE	E4	1st			10	2	0	1	0	0	1
134	6	ACPH	M1	0	TURQUESA	E4	1st			134	2	1	0	0	0	1
146	6	ACPH	M2	60	TURQUESA	E4	1st			146	5	1	1	1	0	3
77	6	ACPH	M3	90	TURQUESA	E4	1st			77	4	1	1	1	0	3
28	6	ACPH	M4	120	TURQUESA	E4	1st			28	4	2	1	2	0	5
14	6	ACPH	M1	0	FAVORITO	E4	1st			14	3	1	1	1	0	3
131	6	ACPH	M2	60	FAVORITO	E4	1st			131	5	2	2	1	1	6
152	6	ACPH	M3	90	FAVORITO	E4	1st			152	6	2	2	2	1	7
132	6	ACPH	M4	120	FAVORITO	E4	1st			132	3	1	1	0	0	2
55	6	ACPH	M1	0	PLANETA	E4	1st			55	2	1	0	0	0	1
27	6	ACPH	M2	60	PLANETA	E4	1st			27	6	1	2	2	2	7
168	6	ACPH	M3	90	PLANETA	E4	1st			168	7	1	2	2	2	7
127	6	ACPH	M4	120	PLANETA	E4	1st			127	8	1	2	1	2	6
42	6	ACPH	M1	0	PARIS.BELLS	E4	1st			42	2	1	0	0	0	1
116	6	ACPH	M2	60	PARIS.BELLS	E4	1st			116	6	2	1	1	1	5
140	6	ACPH	M3	90	PARIS.BELLS	E4	1st			140	3	1	1	0	0	2
45	6	ACPH	M4	120	PARIS.BELLS	E4	1st			45	4	1	1	1	1	4
40	1	DL	M1	0	DIAMANTE	E4	2nd			40	3	2	0	1	0	3
28	1	DL	M2	120	DIAMANTE	E4	2nd			28	9	2	2	1	1	6
138	1	DL	M3	150	DIAMANTE	E4	2nd			138	3	1	1	0	0	2
168	1	DL	M4	240	DIAMANTE	E4	2nd			168	2	1	0	0	0	1
53	1	DL	M1	0	TUFAO	E4	2nd			53	2	1	0	0	0	1
34	1	DL	M2	120	TUFAO	E4	2nd			34	8	2	2	0	1	5
131	1	DL	M3	150	TUFAO	E4	2nd			131	5	1	1	0	1	3
19	1	DL	M4	240	TUFAO	E4	2nd			19	3	1	0	0	1	2
91	2	DL	M1	0	TURQUESA	E4	2nd			91	1	1	0	0	0	1
166	2	DL	M2	120	TURQUESA	E4	2nd			166	5	1	2	0	0	3
165	2	DL	M3	150	TURQUESA	E4	2nd			165	3	1	1	0	1	3
9	2	DL	M4	240	TURQUESA	E4	2nd			9	2	2	1	0	0	3
33	2	DL	M1	0	FAVORITO	E4	2nd			33	2	1	0	0	0	1
50	2	DL	M2	120	FAVORITO	E4	2nd			50	7	2	1	1	1	5
141	2	DL	M3	150	FAVORITO	E4	2nd			141	2	1	1	0	0	2
12	2	DL	M4	240	FAVORITO	E4	2nd			12	3	1	0	1	0	2
122	2	DL	M1	0	PARIS.BELLS	E4	2nd			122	2	0	0	0	0	0
23	2	DL	M2	120	PARIS.BELLS	E4	2nd			23	6	2	1	1	1	5
119	2	DL	M3	150	PARIS.BELLS	E4	2nd			119	3	1	1	1	0	3
88	2	DL	M4	240	PARIS.BELLS	E4	2nd			88	2	1	0	0	0	1
154	3	DL	M1	0	MARJORIE	E4	2nd			154	2	1	0	0	0	1
11	3	DL	M2	120	MARJORIE	E4	2nd			11	4	2	2	1	2	7
24	3	DL	M3	150	MARJORIE	E4	2nd			24	5	2	1	1	1	5
110	3	DL	M4	240	MARJORIE	E4	2nd			110	3	1	0	0	0	1
132	4	DL	M1	0	PLANETA	E4	2nd			132	2	0	0	0	0	0
32	4	DL	M2	120	PLANETA	E4	2nd			32	10	2	2	2	2	8
18	4	DL	M3	150	PLANETA	E4	2nd			18	3	1	1	0	1	3
118	4	DL	M4	240	PLANETA	E4	2nd			118	6	1	1	1	2	5
16	1	DH	M1	0	FAVORITO	E4	2nd			16	3	1	0	0	1	2
14	1	DH	M2	120	FAVORITO	E4	2nd			14	8	2	1	1	2	6
113	1	DH	M3	150	FAVORITO	E4	2nd			113	5	2	1	1	1	5
4	1	DH	M4	240	FAVORITO	E4	2nd			4	3	1	0	0	1	2
115	2	DH	M1	0	DIAMANTE	E4	2nd			115	2	0	1	0	0	1
106	2	DH	M2	120	DIAMANTE	E4	2nd			106	9	1	1	2	2	6
76	2	DH	M3	150	DIAMANTE	E4	2nd			76	4	2	1	1	0	4
62	2	DH	M4	240	DIAMANTE	E4	2nd			62	3	2	0	1	1	4
45	2	DH	M1	0	PLANETA	E4	2nd			45	1	0	0	0	0	0
29	2	DH	M2	120	PLANETA	E4	2nd			29	10	2	2	2	2	8
152	2	DH	M3	150	PLANETA	E4	2nd			152	8	1	2	2	2	7
100	2	DH	M4	240	PLANETA	E4	2nd			100	3	1	1	1	2	5
93	4	DH	M1	0	TURQUESA	E4	2nd			93	2	1	0	0	0	1
25	4	DH	M2	120	TURQUESA	E4	2nd			25	8	2	1	1	1	5
102	4	DH	M3	150	TURQUESA	E4	2nd			102	4	2	1	0	0	3
97	4	DH	M4	240	TURQUESA	E4	2nd			97	1	1	0	0	0	1
68	4	DH	M1	0	PARIS.BELLS	E4	2nd			68	2	1	0	0	0	1
126	4	DH	M2	120	PARIS.BELLS	E4	2nd			126	9	2	2	2	2	8
167	4	DH	M3	150	PARIS.BELLS	E4	2nd			167	8	2	2	1	1	6
83	4	DH	M4	240	PARIS.BELLS	E4	2nd			83	3	1	1	0	0	2
3	4	DH	M1	0	TUFAO	E4	2nd			3	2	1	0	0	1	2
111	4	DH	M2	120	TUFAO	E4	2nd			111	9	2	2	1	1	6
65	4	DH	M3	150	TUFAO	E4	2nd			65	7	2	2	1	2	7
38	4	DH	M4	240	TUFAO	E4	2nd			38	3	2	0	0	0	2
36	4	DH	M1	0	MARJORIE	E4	2nd			36	4	2	0	1	0	3
17	4	DH	M2	120	MARJORIE	E4	2nd			17	9	2	2	2	2	8
146	4	DH	M3	150	MARJORIE	E4	2nd			146	6	2	1	1	1	5
82	4	DH	M4	240	MARJORIE	E4	2nd			82	2	1	0	0	0	1
156	1	DLM	M1	0	MARJORIE	E4	2nd			156	1	0	0	0	0	0
101	1	DLM	M2	120	MARJORIE	E4	2nd			101	4	2	1	1	0	4
103	1	DLM	M3	150	MARJORIE	E4	2nd			103	3	1	1	1	0	3
72	1	DLM	M4	240	MARJORIE	E4	2nd			72	2	2	0	0	0	2
109	1	DLM	M1	0	PARIS.BELLS	E4	2nd			109	2	0	0	0	0	0
117	1	DLM	M2	120	PARIS.BELLS	E4	2nd			117	5	2	1	0	0	3
161	1	DLM	M3	150	PARIS.BELLS	E4	2nd			161	2	1	1	0	1	3
89	1	DLM	M4	240	PARIS.BELLS	E4	2nd			89	2	1	1	0	0	2
78	3	DLM	M1	0	DIAMANTE	E4	2nd			78	4	2	1	1	0	4
48	3	DLM	M2	120	DIAMANTE	E4	2nd			48	8	2	2	1	2	7
60	3	DLM	M3	150	DIAMANTE	E4	2nd			60	6	2	1	1	1	5
5	3	DLM	M4	240	DIAMANTE	E4	2nd			5	2	1	0	0	1	2
134	3	DLM	M1	0	FAVORITO	E4	2nd			134	3	1	1	0	0	2
1	3	DLM	M2	120	FAVORITO	E4	2nd			1	3	2	1	0	0	3
155	3	DLM	M3	150	FAVORITO	E4	2nd			155	3	1	1	0	1	3
46	3	DLM	M4	240	FAVORITO	E4	2nd			46	2	1	0	0	1	2
39	1	DLM	M1	0	TURQUESA	E4	2nd			39	1	0	0	0	0	0
114	1	DLM	M2	120	TURQUESA	E4	2nd			114	4	1	1	0	0	2
157	1	DLM	M3	150	TURQUESA	E4	2nd			157	2	1	0	0	0	1
49	1	DLM	M4	240	TURQUESA	E4	2nd			49	1	0	0	0	0	0
63	1	DLM	M1	0	PLANETA	E4	2nd			63	3	1	0	0	0	1
137	1	DLM	M2	120	PLANETA	E4	2nd			137	8	2	2	2	2	8
67	1	DLM	M3	150	PLANETA	E4	2nd			67	8	2	2	1	1	6
135	1	DLM	M4	240	PLANETA	E4	2nd			135	4	1	1	1	1	4
6	3	DLM	M1	0	TUFAO	E4	2nd			6	2	1	0	0	0	1
51	3	DLM	M2	120	TUFAO	E4	2nd			51	6	2	1	0	1	4
99	3	DLM	M3	150	TUFAO	E4	2nd			99	4	1	1	0	0	2
27	3	DLM	M4	240	TUFAO	E4	2nd			27	2	1	0	0	1	2
148	4	DHM	M1	0	DIAMANTE	E4	2nd			148	3	0	1	1	0	2
7	4	DHM	M2	120	DIAMANTE	E4	2nd			7	8	2	2	1	2	7
90	4	DHM	M3	150	DIAMANTE	E4	2nd			90	7	2	2	1	1	6
136	4	DHM	M4	240	DIAMANTE	E4	2nd			136	3	1	1	0	0	2
85	4	DHM	M1	0	FAVORITO	E4	2nd			85	2	1	0	0	0	1
31	4	DHM	M2	120	FAVORITO	E4	2nd			31	6	2	2	1	1	6
26	4	DHM	M3	150	FAVORITO	E4	2nd			26	7	2	1	1	1	5
84	4	DHM	M4	240	FAVORITO	E4	2nd			84	3	1	1	0	0	2
47	2	DHM	M1	0	TUFAO	E4	2nd			47	1	0	0	0	0	0
56	2	DHM	M2	120	TUFAO	E4	2nd			56	9	2	2	1	2	7
64	2	DHM	M3	150	TUFAO	E4	2nd			64	7	2	2	1	2	7
153	2	DHM	M4	240	TUFAO	E4	2nd			153	1	0	0	0	0	0
58	3	DHM	M1	0	TURQUESA	E4	2nd			58	2	1	0	0	0	1
41	3	DHM	M2	120	TURQUESA	E4	2nd			41	8	2	2	1	1	6
71	3	DHM	M3	150	TURQUESA	E4	2nd			71	7	2	2	1	1	6
81	3	DHM	M4	240	TURQUESA	E4	2nd			81	2	1	0	0	0	1
129	2	DHM	M1	0	MARJORIE	E4	2nd			129	1	0	0	0	0	0
144	2	DHM	M2	120	MARJORIE	E4	2nd			144	6	2	1	1	1	5
120	2	DHM	M3	150	MARJORIE	E4	2nd			120	3	1	1	0	0	2
35	2	DHM	M4	240	MARJORIE	E4	2nd			35	1	1	0	0	0	1
42	3	DHM	M1	0	PLANETA	E4	2nd			42	2	1	0	0	0	1
95	3	DHM	M2	120	PLANETA	E4	2nd			95	10	2	2	2	2	8
87	3	DHM	M3	150	PLANETA	E4	2nd			87	10	2	2	2	2	8
61	3	DHM	M4	240	PLANETA	E4	2nd			61	4	1	1	1	1	4
145	3	DHM	M1	0	PARIS.BELLS	E4	2nd			145	2	0	0	0	0	0
96	3	DHM	M2	120	PARIS.BELLS	E4	2nd			96	9	2	1	2	2	7
74	3	DHM	M3	150	PARIS.BELLS	E4	2nd			74	9	2	2	1	1	6
80	3	DHM	M4	240	PARIS.BELLS	E4	2nd			80	1	1	0	0	0	1
13	5	ACPL	M1	0	MARJORIE	E4	2nd			13	3	2	0	1	0	3
125	5	ACPL	M2	60	MARJORIE	E4	2nd			125	3	1	0	1	0	2
139	5	ACPL	M3	90	MARJORIE	E4	2nd			139	3	1	1	0	0	2
124	5	ACPL	M4	120	MARJORIE	E4	2nd			124	3	2	1	1	1	5
133	5	ACPL	M1	0	TURQUESA	E4	2nd			133	1	1	0	0	0	1
86	5	ACPL	M2	60	TURQUESA	E4	2nd			86	3	1	0	1	0	2
79	5	ACPL	M3	90	TURQUESA	E4	2nd			79	4	1	1	1	0	3
98	5	ACPL	M4	120	TURQUESA	E4	2nd			98	3	1	1	0	0	2
43	5	ACPL	M1	0	PARIS.BELLS	E4	2nd			43	2	1	0	1	0	2
57	5	ACPL	M2	60	PARIS.BELLS	E4	2nd			57	2	2	1	0	0	3
77	5	ACPL	M3	90	PARIS.BELLS	E4	2nd			77	3	1	1	1	0	3
163	5	ACPL	M4	120	PARIS.BELLS	E4	2nd			163	3	1	1	1	0	3
15	5	ACPL	M1	0	FAVORITO	E4	2nd			15	3	1	0	0	1	2
21	5	ACPL	M2	60	FAVORITO	E4	2nd			21	5	2	1	2	1	6
116	5	ACPL	M3	90	FAVORITO	E4	2nd			116	3	1	1	1	0	3
162	5	ACPL	M4	120	FAVORITO	E4	2nd			162	3	1	1	1	0	3
150	5	ACPL	M1	0	DIAMANTE	E4	2nd			150	2	1	0	1	0	2
121	5	ACPL	M2	60	DIAMANTE	E4	2nd			121	2	1	0	0	0	1
108	5	ACPL	M3	90	DIAMANTE	E4	2nd			108	3	1	1	0	0	2
55	5	ACPL	M4	120	DIAMANTE	E4	2nd			55	2	1	0	0	0	1
158	5	ACPL	M1	0	TUFAO	E4	2nd			158	2	0	0	0	1	1
66	5	ACPL	M2	60	TUFAO	E4	2nd			66	5	2	1	0	1	4
104	5	ACPL	M3	90	TUFAO	E4	2nd			104	3	1	1	0	1	3
2	5	ACPL	M4	120	TUFAO	E4	2nd			2	2	0	0	0	1	1
105	5	ACPL	M1	0	PLANETA	E4	2nd			105	2	0	0	0	0	0
92	5	ACPL	M2	60	PLANETA	E4	2nd			92	9	2	2	2	2	8
30	5	ACPL	M3	90	PLANETA	E4	2nd			30	3	0	1	0	1	2
73	5	ACPL	M4	120	PLANETA	E4	2nd			73	6	1	1	1	1	4
37	6	ACPH	M1	0	DIAMANTE	E4	2nd			37	2	2	0	0	0	2
107	6	ACPH	M2	60	DIAMANTE	E4	2nd			107	3	1	1	1	0	3
20	6	ACPH	M3	90	DIAMANTE	E4	2nd			20	8	2	1	2	1	6
70	6	ACPH	M4	120	DIAMANTE	E4	2nd			70	6	2	1	1	0	4
142	6	ACPH	M1	0	TUFAO	E4	2nd			142	2	1	0	0	1	2
127	6	ACPH	M2	60	TUFAO	E4	2nd			127	5	1	1	0	1	3
140	6	ACPH	M3	90	TUFAO	E4	2nd			140	3	1	1	0	1	3
112	6	ACPH	M4	120	TUFAO	E4	2nd			112	4	1	1	1	1	4
164	6	ACPH	M1	0	MARJORIE	E4	2nd			164	3	1	1	0	0	2
22	6	ACPH	M2	60	MARJORIE	E4	2nd			22	5	2	1	0	0	3
159	6	ACPH	M3	90	MARJORIE	E4	2nd			159	3	1	1	0	0	2
143	6	ACPH	M4	120	MARJORIE	E4	2nd			143	3	0	1	0	0	1
151	6	ACPH	M1	0	TURQUESA	E4	2nd			151	1	1	0	0	0	1
59	6	ACPH	M2	60	TURQUESA	E4	2nd			59	5	1	0	1	0	2
160	6	ACPH	M3	90	TURQUESA	E4	2nd			160	4	0	1	1	0	2
52	6	ACPH	M4	120	TURQUESA	E4	2nd			52	5	2	1	1	0	4
8	6	ACPH	M1	0	FAVORITO	E4	2nd			8	3	1	1	1	0	3
94	6	ACPH	M2	60	FAVORITO	E4	2nd			94	8	2	1	2	1	6
149	6	ACPH	M3	90	FAVORITO	E4	2nd			149	5	2	2	1	1	6
123	6	ACPH	M4	120	FAVORITO	E4	2nd			123	3	1	1	1	1	4
69	6	ACPH	M1	0	PLANETA	E4	2nd			69	2	1	0	0	0	1
54	6	ACPH	M2	60	PLANETA	E4	2nd			54	6	2	1	1	1	5
44	6	ACPH	M3	90	PLANETA	E4	2nd			44	7	2	2	2	2	8
75	6	ACPH	M4	120	PLANETA	E4	2nd			75	8	2	2	1	2	7
130	6	ACPH	M1	0	PARIS.BELLS	E4	2nd			130	3	1	1	1	1	4
128	6	ACPH	M2	60	PARIS.BELLS	E4	2nd			128	5	1	1	1	1	4
10	6	ACPH	M3	90	PARIS.BELLS	E4	2nd			10	5	2	1	1	1	5
147	6	ACPH	M4	120	PARIS.BELLS	E4	2nd			147	5	1	1	1	1	4
